# Supplementary material
Source: publisher site journal article supplement (https://www.dovepress.com/article/608125)
Supplement: Supplementary file 1 [file 608125%20Supplementary%20Material.docx]

**Supplementary Figure 1** The causal effect of lung cancer (LC) on chronic obstructive pulmonary disease (COPD). (A) The forest diagram illustrating effect of LC on COPD. (B) The scatter plot. (C) The forest plot. (D) The funnel plot.


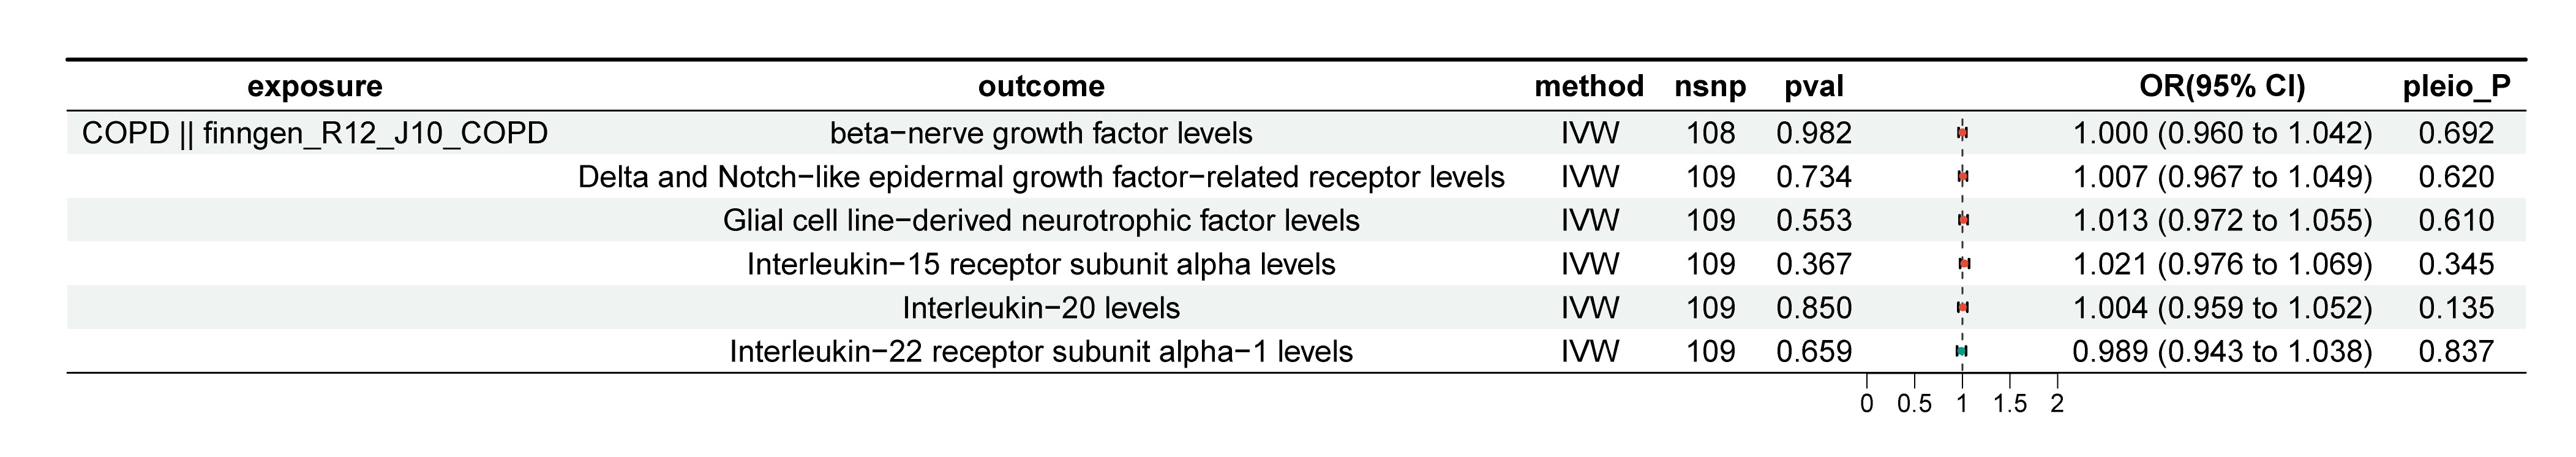


**Supplementary Figure 2** The causal effect of COPD on inflammatory factors.

**Supplementary Table 1 STROBE-MR checklist of recommended items to address in reports of Mendelian randomization studies**

| **Item No.** | **Section** | **Checklist item** | **Page No.** |
| --- | --- | --- | --- |
| 1 | **TITLE and ABSTRACT** | Indicate Mendelian randomization (MR) as the study’s design in the title and/or the abstract if that is a main purpose of the study | Page 1 |
|  | **INTRODUCTION** |  |  |
| 2 | **Background** | Explain the scientific background and rationale for the reported study. What is the exposure? Is a potential causal relationship between exposure and outcome plausible? Justify why MR is a helpful method to address the study question | Page 2 |
| 3 | **Objectives** | State specific objectives clearly, including pre-specified causal hypotheses (if any). State that MR is a method that, under specific assumptions, intends to estimate causal effects | Page 3 |
|  | **METHODS** |  |  |
| 4 | **Study design and data sources** | Present key elements of the study design early in the article. Consider including a table listing sources of data for all phases of the study. For each data source contributing to the analysis, describe the following: |  |
|  | a) | Setting: Describe the study design and the underlying population, if possible. Describe the setting, locations, and relevant dates, including periods of recruitment, exposure, follow-up, and data collection, when available. | Page 4-6 |
|  | b) | Participants: Give the eligibility criteria, and the sources and methods of selection of participants. Report the sample size, and whether any power or sample size calculations were carried out prior to the main analysis | Page 4-6 |
|  | c) | Describe measurement, quality control and selection of genetic variants | Page 4-6 |
|  | d) | For each exposure, outcome, and other relevant variables, describe methods of assessment and diagnostic criteria for diseases | Page 4-6 |
|  | e) | Provide details of ethics committee approval and participant informed consent, if relevant | NA |
| 5 | **Assumptions** | Explicitly state the three core IV assumptions for the main analysis (relevance, independence and exclusion restriction) as well assumptions for any additional or sensitivity analysis | Page 4 |
| 6 | **Statistical methods: main analysis** | Describe statistical methods and statistics used |  |
|  | a) | Describe how quantitative variables were handled in the analyses (i.e., scale, units, model) | NA |
|  | b) | Describe how genetic variants were handled in the analyses and, if applicable, how their weights were selected | Page 4-6 |
|  | c) | Describe the MR estimator (e.g. two-stage least squares, Wald ratio) and related statistics. Detail the included covariates and, in case of two-sample MR, whether the same covariate set was used for adjustment in the two samples | Page 6 |
|  | d) | Explain how missing data were addressed | NA |
|  | e) | If applicable, indicate how multiple testing was addressed | NA |
| 7 | **Assessment of assumptions** | Describe any methods or prior knowledge used to assess the assumptions or justify their validity | Page 6 |
| 8 | **Sensitivity analyses and additional analyses** | Describe any sensitivity analyses or additional analyses performed (e.g. comparison of effect estimates from different approaches, independent replication, bias analytic techniques, validation of instruments, simulations) | Page 6 |
| 9 | **Software and pre-registration** |  |  |
|  | a) | Name statistical software and package(s), including version and settings used | NA |
|  | b) | State whether the study protocol and details were pre-registered (as well as when and where) | NA |
|  | **RESULTS** |  |  |
| 10 | **Descriptive data** |  |  |
|  | a) | Report the numbers of individuals at each stage of included studies and reasons for exclusion. Consider use of a flow diagram | Figure 1 |
|  | b) | Report summary statistics for phenotypic exposure(s), outcome(s), and other relevant variables (e.g. means, SDs, proportions) | Page 7-9 |
|  | c) | If the data sources include meta-analyses of previous studies, provide the assessments of heterogeneity across these studies | NA |
|  | d) | For two-sample MR:  i.  Provide justification of the similarity of the genetic variant-exposure associations between the exposure and outcome samples  ii.  Provide information on the number of individuals who overlap between the exposure and outcome studies | Page 7-9 |
| 11 | **Main results** |  |  |
|  | a) | Report the associations between genetic variant and exposure, and between genetic variant and outcome, preferably on an interpretable scale | Page 7-9 |
|  | b) | Report MR estimates of the relationship between exposure and outcome, and the measures of uncertainty from the MR analysis, on an interpretable scale, such as odds ratio or relative risk per SD difference | Page 7-9 |
|  | c) | If relevant, consider translating estimates of relative risk into absolute risk for a meaningful time period | NA |
|  | d) | Consider plots to visualize results (e.g. forest plot, scatterplot of associations between genetic variants and outcome versus between genetic variants and exposure) | Page 7-9 |
| 12 | **Assessment of assumptions** |  |  |
|  | a) | Report the assessment of the validity of the assumptions | NA |
|  | b) | Report any additional statistics (e.g., assessments of heterogeneity across genetic variants, such as *I2*, Q statistic or E-value) | NA |
| 13 | **Sensitivity analyses and additional analyses** |  |  |
|  | a) | Report any sensitivity analyses to assess the robustness of the main results to violations of the assumptions | Page 7-9 |
|  | b) | Report results from other sensitivity analyses or additional analyses | NA |
|  | c) | Report any assessment of direction of causal relationship (e.g., bidirectional MR) | Page 7-9 |
|  | d) | When relevant, report and compare with estimates from non-MR analyses | NA |
|  | e) | Consider additional plots to visualize results (e.g., leave-one-out analyses) | NA |
|  | **DISCUSSION** |  |  |
| 14 | **Key results** | Summarize key results with reference to study objectives | Page 9-12 |
| 15 | **Limitations** | Discuss limitations of the study, taking into account the validity of the IV assumptions, other sources of potential bias, and imprecision. Discuss both direction and magnitude of any potential bias and any efforts to address them | Page 11-12 |
| 16 | **Interpretation** |  |  |
|  | a) | Meaning: Give a cautious overall interpretation of results in the context of their limitations and in comparison with other studies | Page 9-12 |
|  | b) | Mechanism: Discuss underlying biological mechanisms that could drive a potential causal relationship between the investigated exposure and the outcome, and whether the gene-environment equivalence assumption is reasonable. Use causal language carefully, clarifying that IV estimates may provide causal effects only under certain assumptions | Page 9-12 |
|  | c) | Clinical relevance: Discuss whether the results have clinical or public policy relevance, and to what extent they inform effect sizes of possible interventions | Page 9-12 |
| 17 | **Generalizability** | Discuss the generalizability of the study results (a) to other populations, (b) across other exposure periods/timings, and (c) across other levels of exposure | Page 11 |
|  | **OTHER INFORMATION** |  |  |
| 18 | **Funding** | Describe sources of funding and the role of funders in the present study and, if applicable, sources of funding for the databases and original study or studies on which the present study is based | Page 12 |
| 19 | **Data and data sharing** | Provide the data used to perform all analyses or report where and how the data can be accessed, and reference these sources in the article. Provide the statistical code needed to reproduce the results in the article, or report whether the code is publicly accessible and if so, where | Page 13 |
| 20 | **Conflicts of Interest** | All authors should declare all potential conflicts of interest | Page 13 |

This checklist is copyrighted by the Equator Network under the Creative Commons Attribution 3.0 Unported (CC BY 3.0) license.

1. Skrivankova VW, Richmond RC, Woolf BAR, Yarmolinsky J, Davies NM, Swanson SA, et al. Strengthening the Reporting of Observational Studies in Epidemiology using Mendelian Randomization (STROBE-MR) Statement. JAMA. 2021;under review.

2. Skrivankova VW, Richmond RC, Woolf BAR, Davies NM, Swanson SA, VanderWeele TJ, et al. Strengthening the Reporting of Observational Studies in Epidemiology using Mendelian Randomisation (STROBE-MR): Explanation and Elaboration. BMJ. 2021;375:n2233.

Supplementary Table 2 The casual relationships between blood metabolites and lung cancer (LC)

| id.exposure | exposure | id.outcome | method | nsnp | b | se | pval | lo_ci | up_ci | or | or_lci95 | or_uci95 | pleio_P | heter_P | MR_PRESSO_Pvalue | steiger_pval |
| --- | --- | --- | --- | --- | --- | --- | --- | --- | --- | --- | --- | --- | --- | --- | --- | --- |
| GCST90200114 | Glycosyl-N-tricosanoyl-sphingadienine (d18:2/23:0) levels | lung cancer (ieu-a-987) | Inverse variance weighted (fixed effects) | 25 | -0.107 | 0.029 | 0.000 | -0.164 | -0.051 | 0.898 | 0.849 | 0.951 | 0.179 | 0.104 | 0.119 | 8.45E-125 |
| GCST90199747 | Isovalerylcarnitine (C5) levels | lung cancer (ieu-a-987) | Inverse variance weighted (fixed effects) | 26 | -0.099 | 0.029 | 0.001 | -0.155 | -0.043 | 0.906 | 0.856 | 0.958 | 0.924 | 0.094 | 0.073 | 6.80E-148 |
| GCST90200685 | 1-stearoyl-2-arachidonoyl-gpc (18:0/20:4) levels | lung cancer (ieu-a-987) | Inverse variance weighted (fixed effects) | 32 | 0.054 | 0.016 | 0.001 | 0.022 | 0.086 | 1.055 | 1.022 | 1.090 | 0.313 | 0.799 | 0.835 | 0.000 |
| GCST90200347 | 2-hydroxyhippurate (salicylurate) levels | lung cancer (ieu-a-987) | Inverse variance weighted (fixed effects) | 24 | -0.118 | 0.038 | 0.002 | -0.192 | -0.044 | 0.889 | 0.825 | 0.957 | 0.765 | 0.585 | 0.631 | 5.24E-92 |
| GCST90200058 | 1-(1-enyl-stearoyl)-2-arachidonoyl-GPE (p-18:0/20:4) levels | lung cancer (ieu-a-987) | Inverse variance weighted (fixed effects) | 21 | 0.088 | 0.029 | 0.002 | 0.032 | 0.145 | 1.092 | 1.032 | 1.156 | 0.068 | 0.148 | 0.177 | 1.33E-143 |
| GCST90200898 | Citrulline to phosphate ratio | lung cancer (ieu-a-987) | Inverse variance weighted (fixed effects) | 30 | -0.094 | 0.031 | 0.003 | -0.155 | -0.033 | 0.911 | 0.857 | 0.968 | 0.515 | 0.066 | 0.073 | 3.17E-121 |
| GCST90200692 | 1-palmitoyl-2-arachidonoyl-gpc (16:0/20:4n6) levels | lung cancer (ieu-a-987) | Inverse variance weighted (fixed effects) | 29 | 0.055 | 0.018 | 0.003 | 0.019 | 0.090 | 1.056 | 1.019 | 1.094 | 0.809 | 0.078 | 0.156 | 0.000 |
| GCST90199752 | Epiandrosterone sulfate levels | lung cancer (ieu-a-987) | Inverse variance weighted (fixed effects) | 20 | -0.111 | 0.037 | 0.003 | -0.184 | -0.039 | 0.895 | 0.832 | 0.962 | 0.831 | 0.165 | 0.042 | 4.39E-90 |
| GCST90199788 | 1-arachidonoyl-gpc (20:4n6) levels | lung cancer (ieu-a-987) | Inverse variance weighted (fixed effects) | 25 | 0.057 | 0.020 | 0.003 | 0.019 | 0.096 | 1.059 | 1.019 | 1.100 | 0.832 | 0.087 | 0.152 | 2.23E-290 |
| GCST90200618 | X-23782 levels | lung cancer (ieu-a-987) | Inverse variance weighted (fixed effects) | 20 | -0.117 | 0.040 | 0.004 | -0.196 | -0.038 | 0.890 | 0.822 | 0.962 | 0.249 | 0.104 | 0.125 | 2.13E-78 |
| GCST90200259 | Pentose acid levels | lung cancer (ieu-a-987) | Inverse variance weighted (fixed effects) | 21 | -0.107 | 0.037 | 0.004 | -0.179 | -0.034 | 0.899 | 0.836 | 0.967 | 0.721 | 0.364 | 0.392 | 3.10E-84 |
| GCST90200742 | Aspartate to citrate ratio | lung cancer (ieu-a-987) | Inverse variance weighted (fixed effects) | 18 | 0.113 | 0.039 | 0.004 | 0.036 | 0.190 | 1.119 | 1.036 | 1.209 | 0.959 | 0.144 | 0.172 | 3.99E-81 |
| GCST90199621 | Carnitine levels | lung cancer (ieu-a-987) | Inverse variance weighted (fixed effects) | 26 | -0.060 | 0.022 | 0.006 | -0.103 | -0.017 | 0.942 | 0.902 | 0.983 | 0.410 | 0.311 | 0.373 | 3.98E-255 |
| GCST90200108 | N-palmitoyl-sphingadienine (d18:2/16:0) levels | lung cancer (ieu-a-987) | Inverse variance weighted (fixed effects) | 19 | 0.104 | 0.038 | 0.006 | 0.030 | 0.179 | 1.110 | 1.030 | 1.196 | 0.521 | 0.994 | 0.995 | 9.04E-77 |
| GCST90200178 | Glucuronide of C10H18O2 (7) levels | lung cancer (ieu-a-987) | Inverse variance weighted (fixed effects) | 21 | 0.086 | 0.031 | 0.006 | 0.024 | 0.148 | 1.090 | 1.024 | 1.159 | 0.881 | 0.067 | 0.085 | 4.10E-88 |
| GCST90200226 | 5-hydroxy-2-methylpyridine sulfate levels | lung cancer (ieu-a-987) | Inverse variance weighted (multiplicative random effects) | 20 | 0.125 | 0.047 | 0.007 | 0.034 | 0.217 | 1.134 | 1.035 | 1.242 | 0.821 | 0.019 | 0.022 | 6.69E-82 |
| GCST90199832 | Dimethylarginine (sdma + adma) levels | lung cancer (ieu-a-987) | Inverse variance weighted (fixed effects) | 20 | -0.096 | 0.036 | 0.007 | -0.166 | -0.026 | 0.908 | 0.847 | 0.974 | 0.439 | 0.093 | 0.102 | 1.82E-92 |
| GCST90200560 | X-17351 levels | lung cancer (ieu-a-987) | Inverse variance weighted (fixed effects) | 18 | -0.101 | 0.038 | 0.007 | -0.175 | -0.027 | 0.904 | 0.840 | 0.973 | 0.075 | 0.248 | 0.248 | 6.13E-74 |
| GCST90200526 | X-14056 levels | lung cancer (ieu-a-987) | Inverse variance weighted (multiplicative random effects) | 19 | 0.127 | 0.048 | 0.008 | 0.034 | 0.221 | 1.136 | 1.034 | 1.247 | 0.127 | 0.049 | 0.069 | 1.04E-67 |
| GCST90200749 | Arachidonate (20:4n6) to pyruvate ratio | lung cancer (ieu-a-987) | Inverse variance weighted (fixed effects) | 17 | 0.085 | 0.033 | 0.009 | 0.022 | 0.149 | 1.089 | 1.022 | 1.161 | 0.374 | 0.085 | 0.114 | 7.94E-112 |
| GCST90200902 | Phosphate to linoleoyl-arachidonoyl-glycerol (18:2 to 20:4) [2] ratio | lung cancer (ieu-a-987) | Inverse variance weighted (fixed effects) | 26 | -0.063 | 0.024 | 0.009 | -0.111 | -0.016 | 0.939 | 0.895 | 0.984 | 0.300 | 0.625 | 0.565 | 3.01E-195 |
| GCST90199950 | 2-aminophenol sulfate levels | lung cancer (ieu-a-987) | Inverse variance weighted (fixed effects) | 33 | 0.080 | 0.031 | 0.010 | 0.019 | 0.141 | 1.083 | 1.019 | 1.151 | 0.605 | 0.497 | 0.503 | 7.04E-130 |
| GCST90200633 | X-24334 levels | lung cancer (ieu-a-987) | Inverse variance weighted (fixed effects) | 17 | -0.094 | 0.037 | 0.011 | -0.166 | -0.022 | 0.910 | 0.847 | 0.978 | 0.113 | 0.333 | 0.389 | 9.07E-87 |
| GCST90200740 | Arachidonate (20:4n6) to oleate to vaccenate (18:1) ratio | lung cancer (ieu-a-987) | Inverse variance weighted (fixed effects) | 19 | 0.059 | 0.023 | 0.011 | 0.014 | 0.104 | 1.061 | 1.014 | 1.110 | 0.332 | 0.078 | 0.159 | 5.35E-233 |
| GCST90200415 | Serine levels | lung cancer (ieu-a-987) | Inverse variance weighted (fixed effects) | 34 | 0.062 | 0.024 | 0.011 | 0.014 | 0.110 | 1.064 | 1.015 | 1.117 | 0.753 | 0.722 | 0.736 | 2.40E-211 |
| GCST90200300 | 4-hydroxyphenylpyruvate levels | lung cancer (ieu-a-987) | Inverse variance weighted (fixed effects) | 23 | -0.084 | 0.033 | 0.011 | -0.149 | -0.019 | 0.919 | 0.861 | 0.981 | 0.858 | 0.265 | 0.266 | 2.28E-94 |
| GCST90200243 | Hydroxypalmitoyl sphingomyelin (d18:1/16:0(OH)) levels | lung cancer (ieu-a-987) | Inverse variance weighted (fixed effects) | 26 | -0.085 | 0.034 | 0.013 | -0.152 | -0.018 | 0.919 | 0.859 | 0.982 | 0.476 | 0.259 | 0.009 | 1.94E-105 |
| GCST90200382 | Cystine levels | lung cancer (ieu-a-987) | Inverse variance weighted (fixed effects) | 19 | -0.099 | 0.040 | 0.013 | -0.178 | -0.021 | 0.905 | 0.837 | 0.979 | 0.780 | 0.069 | 0.083 | 7.68E-70 |
| GCST90199945 | Sphingomyelin (d18:1/14:0, d16:1/16:0) levels | lung cancer (ieu-a-987) | Inverse variance weighted (fixed effects) | 27 | 0.083 | 0.034 | 0.013 | 0.017 | 0.149 | 1.087 | 1.018 | 1.161 | 0.227 | 0.129 | 0.038 | 2.32E-112 |
| GCST90200807 | Carnitine to ergothioneine ratio | lung cancer (ieu-a-987) | Inverse variance weighted (fixed effects) | 21 | -0.074 | 0.030 | 0.014 | -0.132 | -0.015 | 0.929 | 0.876 | 0.985 | 0.364 | 0.101 | 0.081 | 2.18E-131 |
| GCST90200955 | Adenosine 5'-diphosphate (ADP) to choline phosphate ratio | lung cancer (ieu-a-987) | Inverse variance weighted (fixed effects) | 20 | 0.069 | 0.028 | 0.014 | 0.014 | 0.125 | 1.072 | 1.014 | 1.133 | 0.066 | 0.140 | 0.011 | 1.79E-86 |
| GCST90200646 | X-24801 levels | lung cancer (ieu-a-987) | Inverse variance weighted (fixed effects) | 34 | -0.060 | 0.025 | 0.016 | -0.108 | -0.011 | 0.942 | 0.897 | 0.989 | 0.861 | 0.185 | 0.209 | 1.11E-195 |
| GCST90199952 | 2-aminoheptanoate levels | lung cancer (ieu-a-987) | Inverse variance weighted (fixed effects) | 27 | 0.067 | 0.028 | 0.016 | 0.013 | 0.121 | 1.069 | 1.013 | 1.128 | 0.161 | 0.548 | 0.512 | 2.95E-103 |
| GCST90200589 | X-21821 levels | lung cancer (ieu-a-987) | Inverse variance weighted (fixed effects) | 19 | -0.095 | 0.039 | 0.016 | -0.172 | -0.017 | 0.910 | 0.842 | 0.983 | 0.060 | 0.526 | 0.588 | 7.63E-75 |
| GCST90200257 | Metabolonic lactone sulfate levels | lung cancer (ieu-a-987) | Inverse variance weighted (fixed effects) | 31 | 0.037 | 0.016 | 0.018 | 0.006 | 0.068 | 1.038 | 1.006 | 1.070 | 0.078 | 0.262 | 0.233 | 0.000 |
| GCST90200840 | Adenosine 5'-diphosphate (ADP) to flavin adenine dinucleotide (FAD) ratio | lung cancer (ieu-a-987) | Inverse variance weighted (fixed effects) | 25 | 0.051 | 0.021 | 0.018 | 0.009 | 0.093 | 1.052 | 1.009 | 1.097 | 0.509 | 0.216 | 0.235 | 2.76E-119 |
| GCST90200482 | X-12193 levels | lung cancer (ieu-a-987) | Inverse variance weighted (fixed effects) | 23 | 0.083 | 0.035 | 0.018 | 0.014 | 0.152 | 1.087 | 1.015 | 1.164 | 0.199 | 0.209 | 0.004 | 2.96E-89 |
| GCST90200330 | 1-palmitoyl-2-linoleoyl-gpc (16:0/18:2) levels | lung cancer (ieu-a-987) | Inverse variance weighted (multiplicative random effects) | 34 | -0.071 | 0.030 | 0.019 | -0.129 | -0.012 | 0.932 | 0.879 | 0.989 | 0.757 | 0.027 | 0.031 | 8.82E-197 |
| GCST90199856 | Androstenediol (3alpha, 17alpha) monosulfate (3) levels | lung cancer (ieu-a-987) | Inverse variance weighted (fixed effects) | 27 | 0.046 | 0.020 | 0.019 | 0.008 | 0.085 | 1.047 | 1.008 | 1.089 | 0.642 | 0.630 | 0.709 | 0.000 |
| GCST90200346 | 4-acetaminophen sulfate levels | lung cancer (ieu-a-987) | Inverse variance weighted (fixed effects) | 26 | -0.060 | 0.026 | 0.019 | -0.111 | -0.010 | 0.942 | 0.895 | 0.990 | 0.075 | 0.052 | 0.049 | 1.81E-112 |
| GCST90200795 | Oleoyl-linoleoyl-glycerol (18:1 to 18:2) [2] to linoleoyl-arachidonoyl-glycerol (18:2 to 20:4) [2] ratio | lung cancer (ieu-a-987) | Inverse variance weighted (fixed effects) | 23 | -0.050 | 0.021 | 0.020 | -0.091 | -0.008 | 0.952 | 0.913 | 0.992 | 0.751 | 0.748 | 0.619 | 1.74E-264 |
| GCST90200829 | Bilirubin (Z,Z) to taurocholate ratio | lung cancer (ieu-a-987) | Inverse variance weighted (fixed effects) | 19 | -0.077 | 0.033 | 0.020 | -0.143 | -0.012 | 0.926 | 0.867 | 0.988 | 0.424 | 0.300 | 0.312 | 2.36E-105 |
| GCST90200801 | 5-methylthioadenosine (MTA) to phosphate ratio | lung cancer (ieu-a-987) | Inverse variance weighted (fixed effects) | 26 | 0.074 | 0.032 | 0.020 | 0.012 | 0.137 | 1.077 | 1.012 | 1.147 | 0.395 | 0.502 | 0.533 | 2.93E-121 |
| GCST90200938 | Alpha-ketoglutarate to alanine ratio | lung cancer (ieu-a-987) | Inverse variance weighted (fixed effects) | 19 | -0.085 | 0.037 | 0.021 | -0.158 | -0.013 | 0.918 | 0.854 | 0.987 | 0.216 | 0.785 | 0.810 | 1.43E-81 |
| GCST90199740 | P-cresol sulfate levels | lung cancer (ieu-a-987) | Inverse variance weighted (fixed effects) | 18 | -0.098 | 0.043 | 0.022 | -0.182 | -0.014 | 0.906 | 0.833 | 0.986 | 0.424 | 0.399 | 0.001 | 9.44E-69 |
| GCST90199948 | S-allylcysteine levels | lung cancer (ieu-a-987) | Inverse variance weighted (fixed effects) | 17 | -0.080 | 0.035 | 0.022 | -0.149 | -0.011 | 0.923 | 0.862 | 0.989 | 0.406 | 0.244 | 0.274 | 6.33E-74 |
| GCST90200491 | X-12026 levels | lung cancer (ieu-a-987) | Inverse variance weighted (fixed effects) | 26 | -0.078 | 0.034 | 0.022 | -0.144 | -0.011 | 0.925 | 0.866 | 0.989 | 0.139 | 0.376 | 0.393 | 1.17E-108 |
| GCST90200731 | Adenosine 5'-diphosphate (ADP) to mannose ratio | lung cancer (ieu-a-987) | Inverse variance weighted (fixed effects) | 17 | 0.069 | 0.030 | 0.023 | 0.010 | 0.128 | 1.071 | 1.010 | 1.136 | 0.710 | 0.237 | 0.254 | 9.90E-74 |
| GCST90199875 | 13-HODE + 9-HODE levels | lung cancer (ieu-a-987) | Inverse variance weighted (fixed effects) | 16 | -0.099 | 0.043 | 0.023 | -0.184 | -0.014 | 0.906 | 0.832 | 0.986 | 0.944 | 0.148 | 0.173 | 1.98E-60 |
| GCST90200156 | Cortolone glucuronide (1) levels | lung cancer (ieu-a-987) | Inverse variance weighted (multiplicative random effects) | 23 | 0.094 | 0.041 | 0.023 | 0.013 | 0.175 | 1.099 | 1.013 | 1.192 | 0.095 | 0.040 | 0.002 | 1.71E-112 |
| GCST90200498 | X-12730 levels | lung cancer (ieu-a-987) | Inverse variance weighted (fixed effects) | 18 | 0.090 | 0.040 | 0.024 | 0.012 | 0.168 | 1.094 | 1.012 | 1.183 | 0.981 | 0.117 | 0.016 | 1.68E-70 |
| GCST90200904 | Phosphate to linoleoyl-arachidonoyl-glycerol (18:2 to 20:4) [1] ratio | lung cancer (ieu-a-987) | Inverse variance weighted (fixed effects) | 22 | -0.059 | 0.026 | 0.024 | -0.111 | -0.008 | 0.942 | 0.895 | 0.992 | 0.266 | 0.072 | 0.099 | 4.41E-163 |
| GCST90200839 | Adenosine 5'-diphosphate (ADP) to aspartate ratio | lung cancer (ieu-a-987) | Inverse variance weighted (fixed effects) | 25 | 0.056 | 0.025 | 0.025 | 0.007 | 0.106 | 1.058 | 1.007 | 1.111 | 0.469 | 0.884 | 0.909 | 4.12E-113 |
| GCST90200908 | Retinol (Vitamin A) to linoleoyl-arachidonoyl-glycerol (18:2 to 20:4) [2] ratio | lung cancer (ieu-a-987) | Inverse variance weighted (fixed effects) | 25 | -0.056 | 0.025 | 0.025 | -0.104 | -0.007 | 0.946 | 0.901 | 0.993 | 0.644 | 0.527 | 0.416 | 1.28E-190 |
| GCST90200046 | 1-stearoyl-2-docosahexaenoyl-gpc (18:0/22:6) levels | lung cancer (ieu-a-987) | Inverse variance weighted (fixed effects) | 27 | 0.060 | 0.027 | 0.025 | 0.008 | 0.113 | 1.062 | 1.008 | 1.119 | 0.431 | 0.119 | 0.101 | 1.04E-175 |
| GCST90200126 | Sphingomyelin (d18:2/23:1) levels | lung cancer (ieu-a-987) | Inverse variance weighted (fixed effects) | 24 | -0.084 | 0.038 | 0.025 | -0.158 | -0.011 | 0.919 | 0.854 | 0.989 | 0.395 | 0.700 | 0.711 | 1.01E-108 |
| GCST90199981 | 2-acetamidophenol sulfate levels | lung cancer (ieu-a-987) | Inverse variance weighted (fixed effects) | 22 | 0.077 | 0.034 | 0.026 | 0.009 | 0.144 | 1.080 | 1.009 | 1.155 | 0.943 | 0.162 | 0.192 | 4.90E-86 |
| GCST90200185 | Gamma-glutamylcitrulline levels | lung cancer (ieu-a-987) | Inverse variance weighted (fixed effects) | 26 | -0.070 | 0.031 | 0.026 | -0.131 | -0.008 | 0.933 | 0.877 | 0.992 | 0.417 | 0.813 | 0.801 | 1.39E-119 |
| GCST90200038 | 1-palmitoyl-2-palmitoleoyl-gpc (16:0/16:1) levels | lung cancer (ieu-a-987) | Inverse variance weighted (fixed effects) | 23 | -0.080 | 0.036 | 0.027 | -0.151 | -0.009 | 0.923 | 0.860 | 0.991 | 0.401 | 0.512 | 0.506 | 1.20E-90 |
| GCST90199956 | 1H-indole-7-acetic acid levels | lung cancer (ieu-a-987) | Inverse variance weighted (fixed effects) | 25 | 0.068 | 0.031 | 0.027 | 0.008 | 0.128 | 1.070 | 1.008 | 1.137 | 0.455 | 0.768 | 0.747 | 5.63E-104 |
| GCST90200852 | Adenosine 5'-monophosphate (AMP) to arginine ratio | lung cancer (ieu-a-987) | Inverse variance weighted (fixed effects) | 17 | -0.097 | 0.044 | 0.028 | -0.182 | -0.011 | 0.908 | 0.833 | 0.989 | 0.911 | 0.390 | 0.377 | 1.92E-64 |
| GCST90200109 | Linoleoyl-arachidonoyl-glycerol (18:2/20:4) [2] levels | lung cancer (ieu-a-987) | Inverse variance weighted (fixed effects) | 33 | 0.049 | 0.022 | 0.028 | 0.005 | 0.092 | 1.050 | 1.005 | 1.097 | 0.398 | 0.203 | 0.196 | 2.11E-240 |
| GCST90199678 | Tartronate (hydroxymalonate) levels | lung cancer (ieu-a-987) | Inverse variance weighted (fixed effects) | 19 | -0.084 | 0.038 | 0.028 | -0.158 | -0.009 | 0.920 | 0.854 | 0.991 | 0.358 | 0.300 | 0.328 | 1.45E-77 |
| GCST90200028 | 1-stearoyl-2-oleoyl-gpc (18:0/18:1) levels | lung cancer (ieu-a-987) | Inverse variance weighted (fixed effects) | 33 | -0.065 | 0.029 | 0.028 | -0.122 | -0.007 | 0.937 | 0.885 | 0.993 | 0.312 | 0.672 | 0.692 | 7.30E-142 |
| GCST90199900 | Argininate levels | lung cancer (ieu-a-987) | Inverse variance weighted (fixed effects) | 22 | -0.075 | 0.034 | 0.028 | -0.142 | -0.008 | 0.928 | 0.868 | 0.992 | 0.663 | 0.211 | 0.018 | 2.42E-102 |
| GCST90201004 | Glucose to N-stearoyl-sphingosine (d18:1 to 18:0) ratio | lung cancer (ieu-a-987) | Inverse variance weighted (fixed effects) | 17 | -0.080 | 0.036 | 0.028 | -0.151 | -0.009 | 0.923 | 0.859 | 0.992 | 0.625 | 0.366 | 0.387 | 3.83E-90 |
| GCST90199623 | Maltotriose levels | lung cancer (ieu-a-987) | Inverse variance weighted (multiplicative random effects) | 22 | 0.086 | 0.039 | 0.028 | 0.009 | 0.162 | 1.090 | 1.009 | 1.176 | 0.263 | 0.005 | 0.002 | 9.40E-94 |
| GCST90200605 | X-21845 levels | lung cancer (ieu-a-987) | Inverse variance weighted (fixed effects) | 20 | 0.066 | 0.030 | 0.029 | 0.007 | 0.125 | 1.068 | 1.007 | 1.133 | 0.123 | 0.555 | 0.574 | 2.93E-87 |
| GCST90200067 | 1-stearoyl-2-linoleoyl-GPI (18:0/18:2) levels | lung cancer (ieu-a-987) | Inverse variance weighted (fixed effects) | 28 | -0.056 | 0.026 | 0.030 | -0.106 | -0.005 | 0.946 | 0.899 | 0.995 | 0.315 | 0.125 | 0.078 | 2.37E-198 |
| GCST90200639 | X-24757 levels | lung cancer (ieu-a-987) | Inverse variance weighted (fixed effects) | 22 | 0.069 | 0.032 | 0.030 | 0.007 | 0.132 | 1.072 | 1.007 | 1.141 | 0.937 | 0.773 | 0.769 | 3.55E-96 |
| GCST90200288 | N-acetylleucine levels | lung cancer (ieu-a-987) | Inverse variance weighted (fixed effects) | 23 | 0.044 | 0.020 | 0.031 | 0.004 | 0.083 | 1.045 | 1.004 | 1.087 | 0.976 | 0.113 | 0.236 | 1.06E-275 |
| GCST90200413 | 2'-deoxyuridine levels | lung cancer (ieu-a-987) | Inverse variance weighted (fixed effects) | 22 | 0.061 | 0.028 | 0.032 | 0.005 | 0.116 | 1.063 | 1.005 | 1.123 | 0.961 | 0.542 | 0.547 | 5.34E-155 |
| GCST90200296 | Methyl indole-3-acetate levels | lung cancer (ieu-a-987) | Inverse variance weighted (fixed effects) | 21 | 0.077 | 0.036 | 0.032 | 0.007 | 0.147 | 1.080 | 1.007 | 1.158 | 0.668 | 0.360 | 0.385 | 1.66E-82 |
| GCST90199867 | Tridecenedioate (C13:1-DC) levels | lung cancer (ieu-a-987) | Inverse variance weighted (multiplicative random effects) | 23 | -0.092 | 0.043 | 0.032 | -0.176 | -0.008 | 0.912 | 0.838 | 0.992 | 0.251 | 0.048 | 0.058 | 1.71E-96 |
| GCST90199928 | 2-stearoyl-GPE (18:0) levels | lung cancer (ieu-a-987) | Inverse variance weighted (fixed effects) | 31 | 0.061 | 0.029 | 0.032 | 0.005 | 0.117 | 1.063 | 1.005 | 1.124 | 0.148 | 0.233 | 0.032 | 3.41E-139 |
| GCST90200768 | Phosphate to 2'-deoxyuridine ratio | lung cancer (ieu-a-987) | Inverse variance weighted (fixed effects) | 29 | -0.056 | 0.026 | 0.033 | -0.108 | -0.005 | 0.945 | 0.898 | 0.995 | 0.723 | 0.188 | 0.192 | 1.88E-167 |
| GCST90200167 | Glutamine conjugate of C7H12O2 levels | lung cancer (ieu-a-987) | Inverse variance weighted (fixed effects) | 30 | 0.069 | 0.033 | 0.033 | 0.006 | 0.133 | 1.072 | 1.006 | 1.143 | 0.336 | 0.451 | 0.464 | 3.39E-124 |
| GCST90200880 | Glutarate (C5-DC) to salicylate ratio | lung cancer (ieu-a-987) | Inverse variance weighted (fixed effects) | 18 | -0.086 | 0.041 | 0.033 | -0.166 | -0.007 | 0.917 | 0.847 | 0.993 | 0.795 | 0.333 | 0.032 | 6.24E-71 |
| GCST90200647 | X-24736 levels | lung cancer (ieu-a-987) | Inverse variance weighted (fixed effects) | 29 | -0.043 | 0.020 | 0.033 | -0.082 | -0.003 | 0.958 | 0.921 | 0.997 | 0.496 | 0.347 | 0.378 | 6.50E-197 |
| GCST90199965 | Fructosyllysine levels | lung cancer (ieu-a-987) | Inverse variance weighted (fixed effects) | 26 | 0.070 | 0.033 | 0.034 | 0.005 | 0.135 | 1.072 | 1.005 | 1.144 | 0.631 | 0.353 | 0.379 | 1.72E-104 |
| GCST90200990 | Benzoate to linoleoyl-arachidonoyl-glycerol (18:2 to 20:4) [2] ratio | lung cancer (ieu-a-987) | Inverse variance weighted (fixed effects) | 23 | -0.053 | 0.025 | 0.034 | -0.102 | -0.004 | 0.948 | 0.903 | 0.996 | 0.219 | 0.183 | 0.176 | 5.01E-153 |
| GCST90200077 | 1-stearoyl-2-oleoyl-GPI (18:0/18:1) levels | lung cancer (ieu-a-987) | Inverse variance weighted (fixed effects) | 21 | -0.059 | 0.028 | 0.035 | -0.115 | -0.004 | 0.942 | 0.892 | 0.996 | 0.219 | 0.206 | 0.202 | 6.33E-153 |
| GCST90200750 | Aspartate to asparagine ratio | lung cancer (ieu-a-987) | Inverse variance weighted (fixed effects) | 16 | 0.080 | 0.038 | 0.035 | 0.006 | 0.154 | 1.083 | 1.006 | 1.167 | 0.829 | 0.107 | 0.005 | 1.17E-76 |
| GCST90200728 | Adenosine 5'-diphosphate (ADP) to Adenosine 5'-monophosphate (AMP) ratio | lung cancer (ieu-a-987) | Inverse variance weighted (fixed effects) | 26 | 0.053 | 0.025 | 0.035 | 0.004 | 0.101 | 1.054 | 1.004 | 1.107 | 0.725 | 0.675 | 0.664 | 2.90E-119 |
| GCST90200849 | Adenosine 5'-monophosphate (AMP) to threonine ratio | lung cancer (ieu-a-987) | Inverse variance weighted (fixed effects) | 27 | 0.070 | 0.033 | 0.035 | 0.005 | 0.135 | 1.072 | 1.005 | 1.144 | 0.676 | 0.972 | 0.969 | 2.52E-107 |
| GCST90199852 | 5alpha-androstan-3beta,17alpha-diol disulfate levels | lung cancer (ieu-a-987) | Inverse variance weighted (fixed effects) | 23 | 0.062 | 0.030 | 0.035 | 0.004 | 0.120 | 1.064 | 1.004 | 1.128 | 0.157 | 0.686 | 0.698 | 1.23E-116 |
| GCST90199786 | 2-hydroxy-3-methylvalerate levels | lung cancer (ieu-a-987) | Inverse variance weighted (fixed effects) | 28 | 0.068 | 0.032 | 0.035 | 0.005 | 0.130 | 1.070 | 1.005 | 1.139 | 0.770 | 0.663 | 0.663 | 1.32E-133 |
| GCST90200672 | X-26054 levels | lung cancer (ieu-a-987) | Inverse variance weighted (fixed effects) | 29 | -0.042 | 0.021 | 0.039 | -0.083 | -0.002 | 0.958 | 0.920 | 0.998 | 0.277 | 0.355 | 0.431 | 0.000 |
| GCST90199972 | Sphingomyelin (d18:1/24:1, d18:2/24:0) levels | lung cancer (ieu-a-987) | Inverse variance weighted (fixed effects) | 18 | -0.087 | 0.042 | 0.039 | -0.171 | -0.004 | 0.916 | 0.843 | 0.996 | 0.493 | 0.433 | 0.432 | 3.89E-69 |
| GCST90200445 | Caprylate (8:0) levels | lung cancer (ieu-a-987) | Inverse variance weighted (fixed effects) | 23 | 0.057 | 0.028 | 0.041 | 0.002 | 0.112 | 1.059 | 1.002 | 1.118 | 0.708 | 0.276 | 0.323 | 7.05E-98 |
| GCST90200403 | Citrulline levels | lung cancer (ieu-a-987) | Inverse variance weighted (fixed effects) | 29 | 0.064 | 0.031 | 0.041 | 0.003 | 0.125 | 1.066 | 1.003 | 1.133 | 0.244 | 0.195 | 0.211 | 1.04E-121 |
| GCST90200994 | Glutamine to alanine ratio | lung cancer (ieu-a-987) | Inverse variance weighted (fixed effects) | 36 | -0.057 | 0.028 | 0.041 | -0.112 | -0.002 | 0.944 | 0.894 | 0.998 | 0.381 | 0.115 | 0.108 | 1.12E-161 |
| GCST90199725 | Campesterol levels | lung cancer (ieu-a-987) | Inverse variance weighted (fixed effects) | 21 | -0.045 | 0.022 | 0.041 | -0.088 | -0.002 | 0.956 | 0.915 | 0.998 | 0.508 | 0.422 | 0.451 | 1.43E-172 |
| GCST90199848 | Succinylcarnitine levels | lung cancer (ieu-a-987) | Inverse variance weighted (fixed effects) | 28 | -0.043 | 0.021 | 0.042 | -0.085 | -0.002 | 0.958 | 0.918 | 0.998 | 0.095 | 0.192 | 0.144 | 2.81E-296 |
| GCST90200523 | X-12844 levels | lung cancer (ieu-a-987) | Inverse variance weighted (fixed effects) | 33 | 0.052 | 0.026 | 0.042 | 0.002 | 0.102 | 1.054 | 1.002 | 1.108 | 0.386 | 0.100 | 0.108 | 1.75E-186 |
| GCST90199996 | Sphingomyelin (d18:1/20:1, d18:2/20:0) levels | lung cancer (ieu-a-987) | Inverse variance weighted (fixed effects) | 26 | -0.064 | 0.031 | 0.043 | -0.125 | -0.002 | 0.938 | 0.883 | 0.998 | 0.130 | 0.236 | 0.005 | 3.38E-149 |
| GCST90199890 | 4-hydroxyglutamate levels | lung cancer (ieu-a-987) | Inverse variance weighted (fixed effects) | 26 | 0.063 | 0.031 | 0.043 | 0.002 | 0.124 | 1.065 | 1.002 | 1.132 | 0.426 | 0.269 | 0.267 | 1.27E-112 |
| GCST90200484 | X-12306 levels | lung cancer (ieu-a-987) | Inverse variance weighted (fixed effects) | 30 | -0.055 | 0.027 | 0.043 | -0.108 | -0.002 | 0.946 | 0.897 | 0.998 | 0.145 | 0.486 | 0.484 | 9.94E-126 |
| GCST90200045 | 1-stearoyl-2-arachidonoyl-GPE (18:0/20:4) levels | lung cancer (ieu-a-987) | Inverse variance weighted (fixed effects) | 28 | 0.038 | 0.019 | 0.043 | 0.001 | 0.074 | 1.038 | 1.001 | 1.077 | 0.988 | 0.186 | 0.206 | 0.000 |
| GCST90200391 | Methionine levels | lung cancer (ieu-a-987) | Inverse variance weighted (fixed effects) | 21 | -0.077 | 0.038 | 0.044 | -0.152 | -0.002 | 0.926 | 0.859 | 0.998 | 0.188 | 0.127 | 0.152 | 2.88E-82 |
| GCST90200980 | Phosphoethanolamine to choline ratio | lung cancer (ieu-a-987) | Inverse variance weighted (fixed effects) | 21 | 0.077 | 0.038 | 0.044 | 0.002 | 0.152 | 1.080 | 1.002 | 1.165 | 0.299 | 0.821 | 0.842 | 3.33E-84 |
| GCST90199889 | 2R,3R-dihydroxybutyrate levels | lung cancer (ieu-a-987) | Inverse variance weighted (fixed effects) | 29 | 0.050 | 0.025 | 0.044 | 0.001 | 0.099 | 1.051 | 1.001 | 1.104 | 0.901 | 0.263 | 0.290 | 6.01E-194 |
| GCST90199766 | 3-(3-amino-3-carboxypropyl)uridine levels | lung cancer (ieu-a-987) | Inverse variance weighted (fixed effects) | 16 | -0.089 | 0.044 | 0.044 | -0.176 | -0.002 | 0.915 | 0.839 | 0.998 | 0.360 | 0.238 | 0.252 | 3.00E-66 |
| GCST90200252 | 3,5-dichloro-2,6-dihydroxybenzoic acid levels | lung cancer (ieu-a-987) | Inverse variance weighted (fixed effects) | 20 | -0.065 | 0.032 | 0.044 | -0.128 | -0.002 | 0.937 | 0.880 | 0.998 | 0.597 | 0.321 | 0.307 | 1.21E-121 |
| GCST90199778 | N-methyl-2-pyridone-5-carboxamide levels | lung cancer (ieu-a-987) | Inverse variance weighted (fixed effects) | 18 | 0.066 | 0.033 | 0.047 | 0.001 | 0.132 | 1.069 | 1.001 | 1.141 | 0.841 | 0.677 | 0.692 | 6.18E-73 |
| GCST90200235 | Succinoyltaurine levels | lung cancer (ieu-a-987) | Inverse variance weighted (fixed effects) | 25 | 0.037 | 0.019 | 0.047 | 0.000 | 0.073 | 1.038 | 1.000 | 1.076 | 0.899 | 0.886 | 0.838 | 4.17E-303 |
| GCST90200054 | 1-palmitoyl-2-arachidonoyl-GPE (16:0/20:4) levels | lung cancer (ieu-a-987) | Inverse variance weighted (fixed effects) | 18 | 0.038 | 0.019 | 0.049 | 0.000 | 0.077 | 1.039 | 1.000 | 1.080 | 0.337 | 0.236 | 0.293 | 0.000 |
| GCST90200584 | X-21736 levels | lung cancer (ieu-a-987) | Inverse variance weighted (multiplicative random effects) | 32 | 0.073 | 0.037 | 0.049 | 0.000 | 0.146 | 1.076 | 1.000 | 1.157 | 0.172 | 0.040 | 0.048 | 1.35E-133 |
| GCST90199942 | Dimethyl sulfone levels | lung cancer (ieu-a-987) | Inverse variance weighted (multiplicative random effects) | 19 | 0.098 | 0.050 | 0.049 | 0.000 | 0.196 | 1.103 | 1.000 | 1.217 | 0.169 | 0.027 | <0.001 | 5.91E-74 |
| GCST90199895 | 1-lignoceroyl-GPC (24:0) levels | lung cancer (ieu-a-987) | Inverse variance weighted (fixed effects) | 16 | 0.080 | 0.041 | 0.049 | 0.000 | 0.160 | 1.083 | 1.000 | 1.173 | 0.469 | 0.465 | 0.435 | 4.07E-70 |
| GCST90200172 | 3-carboxy-4-methyl-5-pentyl-2-furanpropionate (3-CMPFP) levels | lung cancer (ieu-a-987) | Inverse variance weighted (fixed effects) | 23 | 0.063 | 0.032 | 0.049 | 0.000 | 0.127 | 1.065 | 1.000 | 1.135 | 0.978 | 0.168 | 0.182 | 3.15E-116 |
| GCST90199657 | Sphingosine 1-phosphate levels | lung cancer (ieu-a-987) | Inverse variance weighted (fixed effects) | 16 | -0.080 | 0.041 | 0.050 | -0.160 | 0.000 | 0.923 | 0.852 | 1.000 | 0.176 | 0.773 | 0.784 | 2.71E-66 |
| GCST90200606 | X-22509 levels | lung cancer (ieu-a-987) | Inverse variance weighted (fixed effects) | 19 | -0.145 | 0.029 | 0.000 | -0.202 | -0.088 | 0.865 | 0.817 | 0.916 | 0.366 | 0.299 | 0.356 | 1.77E-74 |

Notes: nsnp: the number of single nucleotide polymorphisms; b: beta coefficient; se: standard error; pval: P-value; lo_ci: lower bound of 95% confidence interval; up_ci: upper bound of 95% confidence interval; or: odds ratio; or_lci95: lower bound of 95% confidence interval of odds ratio; or_uci95: upper bound of 95% confidence interval of odds ratio; pleio_P: P-value for horizontal pleiotropy test; heter_P: P-value for heterogeneity test; steiger_pval: P-value of Steiger test

Supplementary Table 3 The casual relationships between LC and blood metabolites

| exposure | id.outcome | outcome | method | nsnp | b | se | pval | lo_ci | up_ci | or | or_lci95 | or_uci95 | pleio_P | heter_P | MR_PRESSO_Pvalue | steiger_pval |
| --- | --- | --- | --- | --- | --- | --- | --- | --- | --- | --- | --- | --- | --- | --- | --- | --- |
| Lung cancer || ieu-a-987 | GCST90199961 | Methionine sulfone levels | Inverse variance weighted (fixed effects) | 57 | 0.073 | 0.027 | 0.006 | 0.020 | 0.125 | 1.075 | 1.021 | 1.133 | 0.124 | 0.787 | 0.745 | 2.86E-11 |
| Lung cancer || ieu-a-987 | GCST90200207 | Methyl vanillate sulfate levels | Inverse variance weighted (fixed effects) | 57 | 0.083 | 0.040 | 0.035 | 0.006 | 0.161 | 1.087 | 1.006 | 1.174 | 0.376 | 0.528 | 0.550 | 0.009 |
| Lung cancer || ieu-a-987 | GCST90200663 | X-25420 levels | Inverse variance weighted (multiplicative random effects) | 57 | 0.075 | 0.031 | 0.016 | 0.014 | 0.135 | 1.077 | 1.014 | 1.145 | 0.723 | 0.043 | 0.035 | 5.34E-07 |
| Lung cancer || ieu-a-987 | GCST90200681 | Orotidine levels | Inverse variance weighted (fixed effects) | 57 | 0.065 | 0.027 | 0.015 | 0.013 | 0.117 | 1.067 | 1.013 | 1.124 | 0.553 | 0.333 | 0.342 | 7.83E-09 |
| Lung cancer || ieu-a-987 | GCST90200758 | Glycine to serine ratio | Inverse variance weighted (fixed effects) | 57 | 0.084 | 0.028 | 0.003 | 0.029 | 0.139 | 1.088 | 1.030 | 1.149 | 0.120 | 0.198 | 0.192 | 4.30E-08 |
| Lung cancer || ieu-a-987 | GCST90200788 | 5-oxoproline to citrate ratio | Inverse variance weighted (fixed effects) | 57 | -0.064 | 0.028 | 0.021 | -0.119 | -0.009 | 0.938 | 0.888 | 0.991 | 0.703 | 0.877 | 0.884 | 2.17E-12 |

Notes: nsnp: the number of single nucleotide polymorphisms; b: beta coefficient; se: standard error; pval: P-value; lo_ci: lower bound of 95% confidence interval; up_ci: upper bound of 95% confidence interval; or: odds ratio; or_lci95: lower bound of 95% confidence interval of odds ratio; or_uci95: upper bound of 95% confidence interval of odds ratio; pleio_P: P-value for horizontal pleiotropy test; heter_P: P-value for heterogeneity test; steiger_pval: P-value of Steiger test

Supplementary Table 4 The casual relationships between inflammatory factors and LC

| outcome | exposure | method | nsnp | b | se | pval | lo_ci | up_ci | or | or_lci95 | or_uci95 | pleio_P | heter_P | MR_PRESSO_Pvalue | steiger_pval |
| --- | --- | --- | --- | --- | --- | --- | --- | --- | --- | --- | --- | --- | --- | --- | --- |
| Lung cancer || id:ieu-a-987 | GCST90274762 || beta-nerve growth factor | Inverse variance weighted (fixed effects) | 29 | 0.104 | 0.041 | 0.012 | 0.023 | 0.185 | 1.110 | 1.024 | 1.203 | 0.360 | 0.816 | 0.831 | 1.85E-112 |
| Lung cancer || id:ieu-a-987 | GCST90274785 || Delta and Notch-like epidermal growth factor-related receptor | Inverse variance weighted (fixed effects) | 22 | -0.139 | 0.044 | 0.002 | -0.226 | -0.052 | 0.870 | 0.798 | 0.949 | 0.732 | 0.364 | 0.393 | 8.57E-85 |
| Lung cancer || id:ieu-a-987 | GCST90274792 || Glial cell line-derived neurotrophic factor | Inverse variance weighted (fixed effects) | 20 | -0.105 | 0.034 | 0.002 | -0.172 | -0.038 | 0.900 | 0.842 | 0.963 | 0.123 | 0.568 | 0.522 | 6.74E-151 |
| Lung cancer || id:ieu-a-987 | GCST90274800 || Interleukin-15 receptor subunit alpha | Inverse variance weighted (fixed effects) | 20 | 0.087 | 0.038 | 0.020 | 0.013 | 0.161 | 1.091 | 1.014 | 1.174 | 0.717 | 0.110 | 0.140 | 4.00E-105 |
| Lung cancer || id:ieu-a-987 | GCST90274807 || Interleukin-20 | Inverse variance weighted (fixed effects) | 22 | 0.129 | 0.044 | 0.004 | 0.042 | 0.215 | 1.137 | 1.043 | 1.240 | 0.096 | 0.459 | 0.450 | 1.17E-79 |
| Lung cancer || id:ieu-a-987 | GCST90274809 || Interleukin-22 receptor subunit alpha-1 | Inverse variance weighted (fixed effects) | 20 | 0.128 | 0.045 | 0.004 | 0.041 | 0.216 | 1.137 | 1.042 | 1.241 | 0.433 | 0.341 | 0.363 | 1.51E-72 |

Notes: nsnp: the number of single nucleotide polymorphisms; b: beta coefficient; se: standard error; pval: P-value; lo_ci: lower bound of 95% confidence interval; up_ci: upper bound of 95% confidence interval; or: odds ratio; or_lci95: lower bound of 95% confidence interval of odds ratio; or_uci95: upper bound of 95% confidence interval of odds ratio; pleio_P: P-value for horizontal pleiotropy test; heter_P: P-value for heterogeneity test; steiger_pval: P-value of Steiger test

Supplementary Table 5 The casual relationships between chronic obstructive pulmonary disease (COPD) and blood metabolites

| id.outcome | outcome | exposure | method | nsnp | b | se | pval | lo_ci | up_ci | or | or_lci95 | or_uci95 | pleio_P | heter_P | MR_PRESSO_Pvalue | steiger_pval |
| --- | --- | --- | --- | --- | --- | --- | --- | --- | --- | --- | --- | --- | --- | --- | --- | --- |
| GCST90199678 | Tartronate (hydroxymalonate) levels | COPD || finngen_R12_J10_COPD | Inverse variance weighted (fixed effects) | 104 | -0.068 | 0.029 | 0.017 | -0.124 | -0.012 | 0.934 | 0.883 | 0.988 | 0.208 | 0.758 | 0.760 | 0.028 |
| GCST90199752 | Epiandrosterone sulfate levels | COPD || finngen_R12_J10_COPD | Inverse variance weighted (multiplicative random effects) | 104 | -0.083 | 0.030 | 0.006 | -0.142 | -0.024 | 0.921 | 0.868 | 0.977 | 0.465 | 0.039 | 0.050 | 4.84E-05 |
| GCST90199856 | Androstenediol (3alpha, 17alpha) monosulfate (3) levels | COPD || finngen_R12_J10_COPD | Inverse variance weighted (fixed effects) | 103 | -0.066 | 0.025 | 0.009 | -0.116 | -0.016 | 0.936 | 0.891 | 0.984 | 0.247 | 0.055 | 0.007 | 0.000 |
| GCST90200058 | 1-(1-enyl-stearoyl)-2-arachidonoyl-GPE (p-18:0/20:4) levels | COPD || finngen_R12_J10_COPD | Inverse variance weighted (fixed effects) | 104 | 0.057 | 0.028 | 0.045 | 0.001 | 0.113 | 1.059 | 1.001 | 1.120 | 0.280 | 0.912 | 0.905 | 0.107 |
| GCST90200059 | Behenoyl dihydrosphingomyelin (d18:0/22:0) levels | COPD || finngen_R12_J10_COPD | Inverse variance weighted (fixed effects) | 104 | 0.057 | 0.028 | 0.041 | 0.002 | 0.112 | 1.059 | 1.002 | 1.119 | 0.077 | 0.246 | 0.238 | 0.003 |
| GCST90200161 | 2-hydroxyarachidate levels | COPD || finngen_R12_J10_COPD | Inverse variance weighted (fixed effects) | 104 | 0.067 | 0.029 | 0.020 | 0.011 | 0.124 | 1.070 | 1.011 | 1.132 | 0.608 | 0.625 | 0.637 | 0.015 |
| GCST90200178 | Glucuronide of C10H18O2 (7) levels | COPD || finngen_R12_J10_COPD | Inverse variance weighted (fixed effects) | 104 | -0.079 | 0.033 | 0.018 | -0.144 | -0.013 | 0.924 | 0.866 | 0.987 | 0.221 | 0.686 | 0.690 | 0.001 |
| GCST90200412 | Glutamate levels | COPD || finngen_R12_J10_COPD | Inverse variance weighted (fixed effects) | 104 | 0.059 | 0.027 | 0.028 | 0.006 | 0.112 | 1.061 | 1.006 | 1.118 | 0.588 | 0.224 | 0.237 | 0.002 |
| GCST90200415 | Serine levels | COPD || finngen_R12_J10_COPD | Inverse variance weighted (fixed effects) | 104 | -0.057 | 0.028 | 0.042 | -0.112 | -0.002 | 0.944 | 0.894 | 0.998 | 0.747 | 0.396 | 0.390 | 0.007 |
| GCST90200436 | Caffeine levels | COPD || finngen_R12_J10_COPD | Inverse variance weighted (fixed effects) | 104 | 0.058 | 0.029 | 0.047 | 0.001 | 0.115 | 1.060 | 1.001 | 1.122 | 0.142 | 0.350 | 0.339 | 0.003 |
| GCST90200639 | X-24757 levels | COPD || finngen_R12_J10_COPD | Inverse variance weighted (fixed effects) | 104 | 0.085 | 0.033 | 0.010 | 0.020 | 0.149 | 1.088 | 1.020 | 1.161 | 0.615 | 0.661 | 0.671 | 0.001 |
| GCST90200654 | X-25217 levels | COPD || finngen_R12_J10_COPD | Inverse variance weighted (fixed effects) | 105 | -0.099 | 0.041 | 0.015 | -0.179 | -0.019 | 0.906 | 0.836 | 0.981 | 0.327 | 0.748 | 0.759 | 5.57E-06 |
| GCST90200682 | 3-methylcytidine levels | COPD || finngen_R12_J10_COPD | Inverse variance weighted (fixed effects) | 104 | -0.057 | 0.027 | 0.034 | -0.110 | -0.004 | 0.944 | 0.895 | 0.996 | 0.751 | 0.391 | 0.392 | 0.005 |
| GCST90200685 | 1-stearoyl-2-arachidonoyl-gpc (18:0/20:4) levels | COPD || finngen_R12_J10_COPD | Inverse variance weighted (fixed effects) | 104 | 0.101 | 0.028 | 0.000 | 0.046 | 0.157 | 1.106 | 1.047 | 1.170 | 0.467 | 0.073 | 0.071 | 7.84E-05 |
| GCST90200692 | 1-palmitoyl-2-arachidonoyl-gpc (16:0/20:4n6) levels | COPD || finngen_R12_J10_COPD | Inverse variance weighted (multiplicative random effects) | 104 | 0.094 | 0.032 | 0.003 | 0.031 | 0.156 | 1.098 | 1.031 | 1.169 | 0.237 | 0.044 | 0.043 | 5.25E-05 |
| GCST90200740 | Arachidonate (20:4n6) to oleate to vaccenate (18:1) ratio | COPD || finngen_R12_J10_COPD | Inverse variance weighted (fixed effects) | 104 | 0.062 | 0.029 | 0.030 | 0.006 | 0.118 | 1.064 | 1.006 | 1.126 | 0.547 | 0.689 | 0.675 | 0.023 |
| GCST90200801 | 5-methylthioadenosine (MTA) to phosphate ratio | COPD || finngen_R12_J10_COPD | Inverse variance weighted (fixed effects) | 104 | 0.079 | 0.027 | 0.004 | 0.026 | 0.133 | 1.082 | 1.026 | 1.142 | 0.743 | 0.055 | 0.045 | 0.000 |
| GCST90200904 | Phosphate to linoleoyl-arachidonoyl-glycerol (18:2 to 20:4) [1] ratio | COPD || finngen_R12_J10_COPD | Inverse variance weighted (fixed effects) | 104 | -0.069 | 0.030 | 0.020 | -0.127 | -0.011 | 0.933 | 0.881 | 0.989 | 0.697 | 0.417 | 0.420 | 0.002 |
| GCST90200907 | Retinol (Vitamin A) to linoleoyl-arachidonoyl-glycerol (18:2 to 20:4) [1] ratio | COPD || finngen_R12_J10_COPD | Inverse variance weighted (fixed effects) | 104 | -0.073 | 0.030 | 0.015 | -0.131 | -0.014 | 0.930 | 0.877 | 0.986 | 0.395 | 0.647 | 0.674 | 0.007 |
| GCST90200946 | Glutamate to alanine ratio | COPD || finngen_R12_J10_COPD | Inverse variance weighted (fixed effects) | 104 | 0.054 | 0.028 | 0.049 | 0.000 | 0.109 | 1.056 | 1.000 | 1.115 | 0.680 | 0.618 | 0.637 | 0.018 |
| GCST90201016 | Bilirubin (Z,Z) to etiocholanolone glucuronide ratio | COPD || finngen_R12_J10_COPD | Inverse variance weighted (fixed effects) | 104 | 0.074 | 0.029 | 0.012 | 0.016 | 0.132 | 1.077 | 1.017 | 1.141 | 0.677 | 0.524 | 0.506 | 0.004 |
| GCST90201019 | Glucuronate to etiocholanolone glucuronide ratio | COPD || finngen_R12_J10_COPD | Inverse variance weighted (fixed effects) | 104 | 0.070 | 0.029 | 0.015 | 0.014 | 0.127 | 1.073 | 1.014 | 1.135 | 0.439 | 0.099 | 0.114 | 0.000 |

Notes: nsnp: the number of single nucleotide polymorphisms; b: beta coefficient; se: standard error; pval: P-value; lo_ci: lower bound of 95% confidence interval; up_ci: upper bound of 95% confidence interval; or: odds ratio; or_lci95: lower bound of 95% confidence interval of odds ratio; or_uci95: upper bound of 95% confidence interval of odds ratio; pleio_P: P-value for horizontal pleiotropy test; heter_P: P-value for heterogeneity test; steiger_pval: P-value of Steiger test

Supplementary Table 6 The casual relationships between blood metabolites and COPD

| id.exposure | outcome | exposure | method | nsnp | b | se | pval | lo_ci | up_ci | or | or_lci95 | or_uci95 | pleio_P | heter_P | MR_PRESSO_Pvalue | steiger_pval |
| --- | --- | --- | --- | --- | --- | --- | --- | --- | --- | --- | --- | --- | --- | --- | --- | --- |
| GCST90199627 | COPD || finngen_R12_J10_COPD | N-alpha-acetylornithine levels | Inverse variance weighted (fixed effects) | 21 | 0.065 | 0.022 | 0.004 | 0.021 | 0.108 | 1.067 | 1.021 | 1.114 | 0.435 | 0.155 | 0.166 | 5.44E-117 |
| GCST90199628 | COPD || finngen_R12_J10_COPD | 3-methylhistidine levels | Inverse variance weighted (multiplicative random effects) | 28 | 0.076 | 0.035 | 0.031 | 0.007 | 0.144 | 1.078 | 1.007 | 1.155 | 0.730 | 0.004 | 0.004 | 4.15E-125 |
| GCST90199633 | COPD || finngen_R12_J10_COPD | Suberate (C8-DC) levels | Inverse variance weighted (fixed effects) | 27 | -0.040 | 0.019 | 0.034 | -0.076 | -0.003 | 0.961 | 0.926 | 0.997 | 0.163 | 0.353 | 0.351 | 3.77E-125 |
| GCST90199639 | COPD || finngen_R12_J10_COPD | Imidazole lactate levels | Inverse variance weighted (fixed effects) | 28 | -0.029 | 0.014 | 0.045 | -0.057 | -0.001 | 0.972 | 0.945 | 0.999 | 0.664 | 0.382 | 0.416 | 0 |
| GCST90199644 | COPD || finngen_R12_J10_COPD | Theobromine levels | Inverse variance weighted (fixed effects) | 25 | -0.063 | 0.028 | 0.022 | -0.117 | -0.009 | 0.939 | 0.889 | 0.991 | 0.770 | 0.384 | 0.408 | 3.59E-116 |
| GCST90199647 | COPD || finngen_R12_J10_COPD | Theophylline levels | Inverse variance weighted (fixed effects) | 21 | 0.070 | 0.029 | 0.018 | 0.012 | 0.127 | 1.072 | 1.012 | 1.135 | 0.830 | 0.600 | <0.001 | 4.01E-96 |
| GCST90199688 | COPD || finngen_R12_J10_COPD | N-acetylglycine levels | Inverse variance weighted (fixed effects) | 23 | 0.042 | 0.020 | 0.039 | 0.002 | 0.081 | 1.042 | 1.002 | 1.084 | 0.588 | 0.137 | 0.162 | 1.45E-247 |
| GCST90199711 | COPD || finngen_R12_J10_COPD | Docosadienoate (22:2n6) levels | Inverse variance weighted (fixed effects) | 21 | 0.083 | 0.030 | 0.005 | 0.025 | 0.141 | 1.087 | 1.026 | 1.151 | 0.507 | 0.286 | 0.315 | 3.78E-94 |
| GCST90199719 | COPD || finngen_R12_J10_COPD | Tauro-beta-muricholate levels | Inverse variance weighted (fixed effects) | 26 | -0.026 | 0.013 | 0.047 | -0.052 | 0.000 | 0.974 | 0.950 | 1.000 | 0.594 | 0.274 | 0.347 | 2.32E-228 |
| GCST90199727 | COPD || finngen_R12_J10_COPD | 1-oleoyl-GPC (18:1) levels | Inverse variance weighted (fixed effects) | 16 | -0.068 | 0.034 | 0.049 | -0.135 | 0.000 | 0.935 | 0.874 | 1.000 | 0.671 | 0.373 | 0.384 | 5.81E-83 |
| GCST90199734 | COPD || finngen_R12_J10_COPD | Hyocholate levels | Inverse variance weighted (fixed effects) | 20 | 0.038 | 0.016 | 0.015 | 0.008 | 0.068 | 1.039 | 1.008 | 1.071 | 0.221 | 0.788 | 0.799 | 2.14E-94 |
| GCST90199735 | COPD || finngen_R12_J10_COPD | N-acetylhistidine levels | Inverse variance weighted (fixed effects) | 23 | 0.043 | 0.016 | 0.007 | 0.012 | 0.074 | 1.044 | 1.012 | 1.076 | 0.685 | 0.171 | 0.032 | 0 |
| GCST90199736 | COPD || finngen_R12_J10_COPD | Alpha-hydroxyisovalerate levels | Inverse variance weighted (fixed effects) | 22 | 0.063 | 0.022 | 0.004 | 0.020 | 0.105 | 1.064 | 1.020 | 1.111 | 0.259 | 0.056 | 0.086 | 7.94E-210 |
| GCST90199739 | COPD || finngen_R12_J10_COPD | Salicyluric glucuronide levels | Inverse variance weighted (fixed effects) | 17 | 0.060 | 0.030 | 0.045 | 0.001 | 0.119 | 1.062 | 1.001 | 1.126 | 0.092 | 0.175 | 0.163 | 8.16E-77 |
| GCST90199752 | COPD || finngen_R12_J10_COPD | Epiandrosterone sulfate levels | Inverse variance weighted (fixed effects) | 24 | 0.023 | 0.012 | 0.045 | 0.001 | 0.046 | 1.024 | 1.001 | 1.047 | 0.904 | 0.486 | 0.585 | 0 |
| GCST90199754 | COPD || finngen_R12_J10_COPD | 7-methylxanthine levels | Inverse variance weighted (fixed effects) | 23 | 0.065 | 0.031 | 0.037 | 0.004 | 0.126 | 1.067 | 1.004 | 1.135 | 0.664 | 0.083 | 0.015 | 1.95E-110 |
| GCST90199764 | COPD || finngen_R12_J10_COPD | N2,n2-dimethylguanosine levels | Inverse variance weighted (fixed effects) | 18 | -0.068 | 0.034 | 0.047 | -0.136 | -0.001 | 0.934 | 0.873 | 0.999 | 0.400 | 0.516 | 0.498 | 5.94E-83 |
| GCST90199775 | COPD || finngen_R12_J10_COPD | Gamma-glutamylisoleucine levels | Inverse variance weighted (fixed effects) | 16 | -0.051 | 0.024 | 0.033 | -0.098 | -0.004 | 0.950 | 0.907 | 0.996 | 0.382 | 0.453 | 0.495 | 7.84E-76 |
| GCST90199777 | COPD || finngen_R12_J10_COPD | 1-palmitoleoyl-GPC (16:1) levels | Inverse variance weighted (fixed effects) | 32 | -0.051 | 0.023 | 0.025 | -0.095 | -0.006 | 0.951 | 0.909 | 0.994 | 0.667 | 0.062 | <0.001 | 1.00E-172 |
| GCST90199782 | COPD || finngen_R12_J10_COPD | Glutamine degradant levels | Inverse variance weighted (multiplicative random effects) | 26 | -0.076 | 0.031 | 0.013 | -0.137 | -0.016 | 0.926 | 0.872 | 0.984 | 0.879 | 0.039 | 0.061 | 1.83E-200 |
| GCST90199792 | COPD || finngen_R12_J10_COPD | 1-palmitoyl-GPE (16:0) levels | Inverse variance weighted (fixed effects) | 18 | -0.054 | 0.026 | 0.035 | -0.105 | -0.004 | 0.947 | 0.900 | 0.996 | 0.232 | 0.079 | 0.101 | 7.45E-141 |
| GCST90199798 | COPD || finngen_R12_J10_COPD | Isobutyrylglycine levels | Inverse variance weighted (fixed effects) | 29 | 0.038 | 0.019 | 0.041 | 0.002 | 0.075 | 1.039 | 1.002 | 1.078 | 0.300 | 0.927 | 0.930 | 3.15E-186 |
| GCST90199811 | COPD || finngen_R12_J10_COPD | Glycolithocholate sulfate levels | Inverse variance weighted (fixed effects) | 22 | -0.028 | 0.013 | 0.026 | -0.053 | -0.003 | 0.972 | 0.948 | 0.997 | 0.462 | 0.680 | 0.705 | 9.57E-140 |
| GCST90199829 | COPD || finngen_R12_J10_COPD | 3-methyladipate levels | Inverse variance weighted (fixed effects) | 16 | 0.092 | 0.032 | 0.004 | 0.030 | 0.154 | 1.096 | 1.031 | 1.166 | 0.783 | 0.535 | 0.481 | 6.27E-76 |
| GCST90199871 | COPD || finngen_R12_J10_COPD | Androstenediol (3beta,17beta) monosulfate (2) levels | Inverse variance weighted (fixed effects) | 27 | 0.058 | 0.024 | 0.016 | 0.011 | 0.106 | 1.060 | 1.011 | 1.112 | 0.147 | 0.749 | 0.761 | 5.75E-145 |
| GCST90199903 | COPD || finngen_R12_J10_COPD | 2-oxoarginine levels | Inverse variance weighted (fixed effects) | 20 | 0.068 | 0.030 | 0.023 | 0.010 | 0.127 | 1.071 | 1.010 | 1.136 | 0.130 | 0.473 | 0.496 | 1.81E-101 |
| GCST90199919 | COPD || finngen_R12_J10_COPD | Alliin levels | Inverse variance weighted (fixed effects) | 19 | -0.044 | 0.019 | 0.025 | -0.082 | -0.006 | 0.957 | 0.921 | 0.994 | 0.085 | 0.066 | 0.068 | 1.07E-179 |
| GCST90199937 | COPD || finngen_R12_J10_COPD | 2-aminooctanoate levels | Inverse variance weighted (fixed effects) | 28 | -0.044 | 0.018 | 0.012 | -0.078 | -0.010 | 0.957 | 0.925 | 0.990 | 0.895 | 0.487 | 0.331 | 0 |
| GCST90199938 | COPD || finngen_R12_J10_COPD | 3-methyl catechol sulfate (1) levels | Inverse variance weighted (fixed effects) | 27 | 0.065 | 0.023 | 0.005 | 0.020 | 0.111 | 1.068 | 1.020 | 1.118 | 0.412 | 0.106 | 0.107 | 1.53E-120 |
| GCST90199939 | COPD || finngen_R12_J10_COPD | 4-methylcatechol sulfate levels | Inverse variance weighted (fixed effects) | 20 | 0.064 | 0.031 | 0.040 | 0.003 | 0.125 | 1.066 | 1.003 | 1.133 | 0.874 | 0.119 | 0.013 | 1.22E-95 |
| GCST90199946 | COPD || finngen_R12_J10_COPD | 3-acetylphenol sulfate levels | Inverse variance weighted (fixed effects) | 20 | 0.062 | 0.026 | 0.015 | 0.012 | 0.113 | 1.064 | 1.012 | 1.119 | 0.801 | 0.498 | 0.489 | 2.22E-92 |
| GCST90199956 | COPD || finngen_R12_J10_COPD | 1H-indole-7-acetic acid levels | Inverse variance weighted (fixed effects) | 29 | 0.044 | 0.021 | 0.031 | 0.004 | 0.085 | 1.045 | 1.004 | 1.089 | 0.260 | 0.190 | 0.214 | 5.37E-135 |
| GCST90199963 | COPD || finngen_R12_J10_COPD | 17alpha-hydroxypregnanolone glucuronide levels | Inverse variance weighted (fixed effects) | 31 | 0.043 | 0.017 | 0.014 | 0.009 | 0.077 | 1.044 | 1.009 | 1.080 | 0.245 | 0.276 | 0.288 | 3.29E-286 |
| GCST90199971 | COPD || finngen_R12_J10_COPD | 3-methylglutarylcarnitine (2) levels | Inverse variance weighted (fixed effects) | 29 | -0.039 | 0.020 | 0.049 | -0.077 | 0.000 | 0.962 | 0.926 | 1.000 | 0.576 | 0.074 | 0.015 | 1.57E-275 |
| GCST90199975 | COPD || finngen_R12_J10_COPD | Sphingomyelin (d18:2/14:0, d18:1/14:1) levels | Inverse variance weighted (fixed effects) | 23 | -0.063 | 0.031 | 0.039 | -0.124 | -0.003 | 0.939 | 0.884 | 0.997 | 0.272 | 0.123 | 0.141 | 2.61E-111 |
| GCST90199996 | COPD || finngen_R12_J10_COPD | Sphingomyelin (d18:1/20:1, d18:2/20:0) levels | Inverse variance weighted (multiplicative random effects) | 27 | -0.069 | 0.027 | 0.009 | -0.122 | -0.017 | 0.933 | 0.886 | 0.983 | 0.860 | 0.041 | 0.050 | 4.24E-192 |
| GCST90200018 | COPD || finngen_R12_J10_COPD | Adipoylcarnitine (C6-DC) levels | Inverse variance weighted (fixed effects) | 22 | -0.080 | 0.024 | 0.001 | -0.127 | -0.033 | 0.923 | 0.880 | 0.967 | 0.467 | 0.282 | 0.034 | 2.23E-175 |
| GCST90200019 | COPD || finngen_R12_J10_COPD | Dopamine 3-o-sulfate levels | Inverse variance weighted (fixed effects) | 25 | -0.048 | 0.020 | 0.016 | -0.087 | -0.009 | 0.953 | 0.916 | 0.991 | 0.063 | 0.502 | 0.570 | 4.19E-115 |
| GCST90200036 | COPD || finngen_R12_J10_COPD | 1-palmitoleoylglycerol (16:1) levels | Inverse variance weighted (fixed effects) | 32 | 0.046 | 0.019 | 0.015 | 0.009 | 0.083 | 1.047 | 1.009 | 1.087 | 0.753 | 0.147 | 0.016 | 2.07E-151 |
| GCST90200044 | COPD || finngen_R12_J10_COPD | 1-(1-enyl-stearoyl)-2-oleoyl-GPE (p-18:0/18:1) levels | Inverse variance weighted (fixed effects) | 19 | 0.099 | 0.028 | 0.000 | 0.044 | 0.154 | 1.104 | 1.045 | 1.166 | 0.169 | 0.153 | 0.150 | 1.63E-93 |
| GCST90200061 | COPD || finngen_R12_J10_COPD | 1-(1-enyl-palmitoyl)-2-oleoyl-GPE (p-16:0/18:1) levels | Inverse variance weighted (multiplicative random effects) | 27 | 0.064 | 0.030 | 0.031 | 0.006 | 0.123 | 1.066 | 1.006 | 1.130 | 0.920 | 0.039 | <0.001 | 7.79E-131 |
| GCST90200090 | COPD || finngen_R12_J10_COPD | Dihomo-linolenoyl-choline levels | Inverse variance weighted (fixed effects) | 27 | -0.056 | 0.024 | 0.018 | -0.103 | -0.010 | 0.945 | 0.902 | 0.990 | 0.428 | 0.322 | 0.334 | 1.32E-128 |
| GCST90200096 | COPD || finngen_R12_J10_COPD | Catechol glucuronide levels | Inverse variance weighted (fixed effects) | 18 | -0.056 | 0.024 | 0.020 | -0.103 | -0.009 | 0.946 | 0.903 | 0.991 | 0.917 | 0.942 | 0.945 | 1.43E-84 |
| GCST90200101 | COPD || finngen_R12_J10_COPD | Pimeloylcarnitine/3-methyladipoylcarnitine (C7-DC) levels | Inverse variance weighted (fixed effects) | 28 | -0.053 | 0.021 | 0.014 | -0.095 | -0.011 | 0.949 | 0.910 | 0.989 | 0.533 | 0.681 | 0.668 | 1.93E-186 |
| GCST90200112 | COPD || finngen_R12_J10_COPD | 2,3-dihydroxy-2-methylbutyrate levels | Inverse variance weighted (fixed effects) | 14 | -0.095 | 0.041 | 0.021 | -0.175 | -0.015 | 0.909 | 0.839 | 0.985 | 0.189 | 0.449 | 0.494 | 2.05E-63 |
| GCST90200140 | COPD || finngen_R12_J10_COPD | Carotene diol (2) levels | Inverse variance weighted (fixed effects) | 22 | 0.090 | 0.031 | 0.003 | 0.030 | 0.150 | 1.094 | 1.030 | 1.162 | 0.353 | 0.068 | 0.017 | 1.38E-105 |
| GCST90200147 | COPD || finngen_R12_J10_COPD | N,N,N-trimethyl-5-aminovalerate levels | Inverse variance weighted (fixed effects) | 28 | -0.051 | 0.026 | 0.046 | -0.101 | -0.001 | 0.950 | 0.904 | 0.999 | 0.681 | 0.556 | <0.001 | 2.99E-148 |
| GCST90200152 | COPD || finngen_R12_J10_COPD | 2-butenoylglycine levels | Inverse variance weighted (fixed effects) | 26 | 0.043 | 0.021 | 0.037 | 0.003 | 0.084 | 1.044 | 1.003 | 1.087 | 0.591 | 0.224 | 0.021 | 1.68E-185 |
| GCST90200180 | COPD || finngen_R12_J10_COPD | Glucuronide of C12H22O4 (1) levels | Inverse variance weighted (fixed effects) | 18 | 0.065 | 0.024 | 0.006 | 0.018 | 0.112 | 1.067 | 1.018 | 1.118 | 0.641 | 0.253 | 0.275 | 4.89E-85 |
| GCST90200186 | COPD || finngen_R12_J10_COPD | 8-methoxykynurenate levels | Inverse variance weighted (fixed effects) | 26 | 0.050 | 0.024 | 0.036 | 0.003 | 0.096 | 1.051 | 1.003 | 1.101 | 0.062 | 0.585 | 0.622 | 3.57E-127 |
| GCST90200194 | COPD || finngen_R12_J10_COPD | N-lactoyl phenylalanine levels | Inverse variance weighted (fixed effects) | 15 | -0.094 | 0.040 | 0.021 | -0.173 | -0.014 | 0.911 | 0.841 | 0.986 | 0.531 | 0.052 | 0.013 | 1.56E-66 |
| GCST90200200 | COPD || finngen_R12_J10_COPD | N-lactoyl valine levels | Inverse variance weighted (fixed effects) | 14 | -0.102 | 0.036 | 0.005 | -0.173 | -0.031 | 0.903 | 0.841 | 0.969 | 0.537 | 0.526 | 0.587 | 4.50E-62 |
| GCST90200206 | COPD || finngen_R12_J10_COPD | Sulfate of piperine metabolite C18H21NO3 (1) levels | Inverse variance weighted (fixed effects) | 24 | 0.063 | 0.027 | 0.020 | 0.010 | 0.116 | 1.065 | 1.010 | 1.123 | 0.828 | 0.095 | 0.102 | 5.36E-114 |
| GCST90200207 | COPD || finngen_R12_J10_COPD | Methyl vanillate sulfate levels | Inverse variance weighted (fixed effects) | 23 | 0.050 | 0.020 | 0.011 | 0.012 | 0.088 | 1.051 | 1.012 | 1.092 | 0.388 | 0.224 | 0.218 | 1.36E-109 |
| GCST90200224 | COPD || finngen_R12_J10_COPD | 2-ketocaprylate levels | Inverse variance weighted (fixed effects) | 23 | -0.046 | 0.021 | 0.031 | -0.087 | -0.004 | 0.955 | 0.917 | 0.996 | 0.325 | 0.126 | 0.088 | 3.56E-181 |
| GCST90200227 | COPD || finngen_R12_J10_COPD | 3-ethylcatechol sulfate (2) levels | Inverse variance weighted (fixed effects) | 14 | -0.074 | 0.029 | 0.011 | -0.130 | -0.017 | 0.929 | 0.878 | 0.983 | 0.241 | 0.485 | 0.469 | 1.55E-67 |
| GCST90200267 | COPD || finngen_R12_J10_COPD | Tetrahydrocortisol glucuronide levels | Inverse variance weighted (multiplicative random effects) | 26 | 0.085 | 0.037 | 0.022 | 0.012 | 0.158 | 1.089 | 1.012 | 1.171 | 0.938 | 0.003 | <0.001 | 2.67E-136 |
| GCST90200268 | COPD || finngen_R12_J10_COPD | N-acetyl-2-aminoadipate levels | Inverse variance weighted (fixed effects) | 22 | 0.075 | 0.021 | 0.000 | 0.033 | 0.116 | 1.078 | 1.034 | 1.123 | 0.190 | 0.085 | 0.111 | 2.98E-202 |
| GCST90200288 | COPD || finngen_R12_J10_COPD | N-acetylleucine levels | Inverse variance weighted (fixed effects) | 22 | 0.060 | 0.017 | 0.000 | 0.027 | 0.093 | 1.062 | 1.027 | 1.097 | 0.954 | 0.086 | 0.176 | 7.05E-306 |
| GCST90200318 | COPD || finngen_R12_J10_COPD | Acetoacetate levels | Inverse variance weighted (fixed effects) | 15 | 0.064 | 0.026 | 0.012 | 0.014 | 0.114 | 1.066 | 1.014 | 1.121 | 0.140 | 0.153 | 0.175 | 3.65E-72 |
| GCST90200323 | COPD || finngen_R12_J10_COPD | Creatine levels | Inverse variance weighted (multiplicative random effects) | 24 | 0.055 | 0.027 | 0.044 | 0.002 | 0.108 | 1.056 | 1.002 | 1.114 | 0.906 | 0.022 | 0.004 | 1.14E-151 |
| GCST90200327 | COPD || finngen_R12_J10_COPD | Choline levels | Inverse variance weighted (fixed effects) | 23 | -0.059 | 0.030 | 0.047 | -0.117 | -0.001 | 0.943 | 0.889 | 0.999 | 0.745 | 0.174 | 0.162 | 1.46E-117 |
| GCST90200329 | COPD || finngen_R12_J10_COPD | 3-phosphoglycerate levels | Inverse variance weighted (fixed effects) | 23 | 0.059 | 0.030 | 0.049 | 0.000 | 0.117 | 1.061 | 1.000 | 1.124 | 0.999 | 0.193 | 0.198 | 9.27E-105 |
| GCST90200352 | COPD || finngen_R12_J10_COPD | Methylsuccinate levels | Inverse variance weighted (multiplicative random effects) | 21 | 0.061 | 0.027 | 0.023 | 0.009 | 0.114 | 1.063 | 1.009 | 1.121 | 0.612 | 0.021 | 0.010 | 3.13E-210 |
| GCST90200353 | COPD || finngen_R12_J10_COPD | 9,10-DiHOME levels | Inverse variance weighted (fixed effects) | 18 | 0.051 | 0.024 | 0.033 | 0.004 | 0.097 | 1.052 | 1.004 | 1.102 | 0.063 | 0.235 | 0.263 | 1.75E-84 |
| GCST90200375 | COPD || finngen_R12_J10_COPD | Gamma-glutamylglutamate levels | Inverse variance weighted (fixed effects) | 27 | -0.060 | 0.028 | 0.033 | -0.115 | -0.005 | 0.942 | 0.892 | 0.995 | 0.855 | 0.326 | 0.345 | 1.08E-134 |
| GCST90200381 | COPD || finngen_R12_J10_COPD | S-1-pyrroline-5-carboxylate levels | Inverse variance weighted (fixed effects) | 19 | -0.068 | 0.031 | 0.028 | -0.128 | -0.007 | 0.935 | 0.880 | 0.993 | 0.941 | 0.347 | 0.371 | 3.04E-92 |
| GCST90200383 | COPD || finngen_R12_J10_COPD | Cystathionine levels | Inverse variance weighted (fixed effects) | 35 | -0.046 | 0.022 | 0.038 | -0.089 | -0.003 | 0.955 | 0.915 | 0.997 | 0.525 | 0.205 | 0.230 | 1.52E-193 |
| GCST90200399 | COPD || finngen_R12_J10_COPD | Isoleucine levels | Inverse variance weighted (fixed effects) | 21 | 0.045 | 0.019 | 0.018 | 0.008 | 0.082 | 1.046 | 1.008 | 1.086 | 0.202 | 0.308 | 0.373 | 9.38E-96 |
| GCST90200412 | COPD || finngen_R12_J10_COPD | Glutamate levels | Inverse variance weighted (fixed effects) | 20 | 0.064 | 0.031 | 0.038 | 0.004 | 0.125 | 1.067 | 1.004 | 1.134 | 0.559 | 0.330 | 0.044 | 5.58E-97 |
| GCST90200425 | COPD || finngen_R12_J10_COPD | Betaine levels | Inverse variance weighted (fixed effects) | 23 | 0.069 | 0.021 | 0.001 | 0.027 | 0.111 | 1.072 | 1.028 | 1.118 | 0.514 | 0.478 | 0.025 | 7.09E-201 |
| GCST90200426 | COPD || finngen_R12_J10_COPD | Xylose levels | Inverse variance weighted (fixed effects) | 25 | -0.056 | 0.023 | 0.013 | -0.100 | -0.012 | 0.946 | 0.905 | 0.989 | 0.066 | 0.100 | 0.128 | 1.35E-116 |
| GCST90200474 | COPD || finngen_R12_J10_COPD | X-11444 levels | Inverse variance weighted (fixed effects) | 30 | 0.047 | 0.021 | 0.024 | 0.006 | 0.088 | 1.048 | 1.006 | 1.091 | 0.754 | 0.137 | 0.147 | 2.65E-282 |
| GCST90200482 | COPD || finngen_R12_J10_COPD | X-12193 levels | Inverse variance weighted (fixed effects) | 27 | 0.056 | 0.026 | 0.029 | 0.006 | 0.106 | 1.057 | 1.006 | 1.112 | 0.587 | 0.157 | 0.162 | 1.86E-125 |
| GCST90200494 | COPD || finngen_R12_J10_COPD | X-12007 levels | Inverse variance weighted (fixed effects) | 13 | -0.070 | 0.031 | 0.025 | -0.132 | -0.009 | 0.932 | 0.877 | 0.991 | 0.676 | 0.122 | 0.178 | 5.27E-61 |
| GCST90200495 | COPD || finngen_R12_J10_COPD | X-12462 levels | Inverse variance weighted (fixed effects) | 10 | 0.085 | 0.040 | 0.034 | 0.006 | 0.163 | 1.088 | 1.006 | 1.177 | 0.932 | 0.071 | 0.017 | 7.38E-44 |
| GCST90200504 | COPD || finngen_R12_J10_COPD | X-12830 levels | Inverse variance weighted (fixed effects) | 27 | -0.035 | 0.017 | 0.044 | -0.068 | -0.001 | 0.966 | 0.934 | 0.999 | 0.977 | 0.840 | 0.801 | 9.26E-131 |
| GCST90200515 | COPD || finngen_R12_J10_COPD | X-12849 levels | Inverse variance weighted (fixed effects) | 22 | -0.062 | 0.026 | 0.017 | -0.113 | -0.011 | 0.940 | 0.893 | 0.989 | 0.921 | 0.311 | 0.315 | 2.84E-99 |
| GCST90200525 | COPD || finngen_R12_J10_COPD | X-13723 levels | Inverse variance weighted (fixed effects) | 13 | 0.069 | 0.032 | 0.032 | 0.006 | 0.132 | 1.072 | 1.006 | 1.141 | 0.541 | 0.932 | 0.927 | 4.06E-62 |
| GCST90200528 | COPD || finngen_R12_J10_COPD | X-17146 levels | Inverse variance weighted (fixed effects) | 19 | -0.068 | 0.029 | 0.019 | -0.124 | -0.011 | 0.935 | 0.883 | 0.989 | 0.523 | 0.060 | 0.083 | 4.39E-87 |
| GCST90200532 | COPD || finngen_R12_J10_COPD | X-16935 levels | Inverse variance weighted (fixed effects) | 25 | -0.058 | 0.019 | 0.002 | -0.095 | -0.022 | 0.943 | 0.909 | 0.979 | 0.859 | 0.332 | 0.399 | 4.76E-255 |
| GCST90200534 | COPD || finngen_R12_J10_COPD | X-16580 levels | Inverse variance weighted (fixed effects) | 18 | 0.065 | 0.031 | 0.036 | 0.004 | 0.126 | 1.067 | 1.004 | 1.134 | 0.434 | 0.124 | 0.138 | 4.05E-85 |
| GCST90200539 | COPD || finngen_R12_J10_COPD | X-14939 levels | Inverse variance weighted (fixed effects) | 19 | 0.053 | 0.025 | 0.034 | 0.004 | 0.102 | 1.054 | 1.004 | 1.107 | 0.150 | 0.376 | 0.019 | 1.62E-122 |
| GCST90200541 | COPD || finngen_R12_J10_COPD | X-15523 levels | Inverse variance weighted (fixed effects) | 85 | 0.011 | 0.004 | 0.002 | 0.004 | 0.018 | 1.011 | 1.004 | 1.018 | 0.559 | 0.581 | 0.636 | 0 |
| GCST90200542 | COPD || finngen_R12_J10_COPD | X-15728 levels | Inverse variance weighted (fixed effects) | 31 | -0.049 | 0.024 | 0.043 | -0.097 | -0.002 | 0.952 | 0.907 | 0.998 | 0.133 | 0.720 | 0.700 | 8.13E-144 |
| GCST90200574 | COPD || finngen_R12_J10_COPD | X-21310 levels | Inverse variance weighted (fixed effects) | 20 | -0.073 | 0.028 | 0.010 | -0.129 | -0.017 | 0.929 | 0.879 | 0.983 | 0.350 | 0.418 | 0.453 | 1.71E-94 |
| GCST90200579 | COPD || finngen_R12_J10_COPD | X-21442 levels | Inverse variance weighted (fixed effects) | 18 | -0.034 | 0.013 | 0.010 | -0.059 | -0.008 | 0.967 | 0.943 | 0.992 | 0.609 | 0.130 | 0.288 | 1.69E-88 |
| GCST90200584 | COPD || finngen_R12_J10_COPD | X-21736 levels | Inverse variance weighted (fixed effects) | 33 | 0.051 | 0.023 | 0.031 | 0.005 | 0.097 | 1.052 | 1.005 | 1.102 | 0.233 | 0.380 | 0.358 | 7.85E-166 |
| GCST90200612 | COPD || finngen_R12_J10_COPD | X-23678 levels | Inverse variance weighted (fixed effects) | 19 | -0.064 | 0.025 | 0.011 | -0.114 | -0.015 | 0.938 | 0.893 | 0.986 | 0.095 | 0.166 | 0.190 | 6.65E-94 |
| GCST90200638 | COPD || finngen_R12_J10_COPD | X-24811 levels | Inverse variance weighted (fixed effects) | 29 | -0.041 | 0.020 | 0.043 | -0.082 | -0.001 | 0.959 | 0.922 | 0.999 | 0.551 | 0.325 | 0.343 | 1.08E-136 |
| GCST90200642 | COPD || finngen_R12_J10_COPD | X-24795 levels | Inverse variance weighted (fixed effects) | 28 | 0.037 | 0.012 | 0.003 | 0.012 | 0.061 | 1.037 | 1.013 | 1.063 | 0.853 | 0.650 | 0.703 | 8.14E-146 |
| GCST90200650 | COPD || finngen_R12_J10_COPD | X-25109 levels | Inverse variance weighted (fixed effects) | 29 | 0.046 | 0.023 | 0.042 | 0.002 | 0.091 | 1.048 | 1.002 | 1.095 | 0.829 | 0.840 | 0.847 | 3.79E-164 |
| GCST90200653 | COPD || finngen_R12_J10_COPD | X-24812 levels | Inverse variance weighted (fixed effects) | 32 | -0.058 | 0.022 | 0.008 | -0.102 | -0.015 | 0.943 | 0.903 | 0.985 | 0.533 | 0.058 | 0.005 | 1.13E-149 |
| GCST90200663 | COPD || finngen_R12_J10_COPD | X-25420 levels | Inverse variance weighted (multiplicative random effects) | 14 | -0.080 | 0.037 | 0.030 | -0.152 | -0.008 | 0.923 | 0.859 | 0.992 | 0.394 | 0.026 | 0.013 | 1.96E-69 |
| GCST90200667 | COPD || finngen_R12_J10_COPD | X-25271 levels | Inverse variance weighted (fixed effects) | 18 | -0.073 | 0.034 | 0.031 | -0.139 | -0.007 | 0.930 | 0.870 | 0.994 | 0.348 | 0.182 | 0.181 | 2.31E-85 |
| GCST90200678 | COPD || finngen_R12_J10_COPD | N-acetylasparagine levels | Inverse variance weighted (fixed effects) | 22 | 0.030 | 0.014 | 0.028 | 0.003 | 0.057 | 1.031 | 1.003 | 1.059 | 0.126 | 0.984 | 0.970 | 0 |
| GCST90200681 | COPD || finngen_R12_J10_COPD | Orotidine levels | Inverse variance weighted (fixed effects) | 28 | 0.018 | 0.007 | 0.011 | 0.004 | 0.032 | 1.018 | 1.004 | 1.032 | 0.729 | 0.256 | 0.368 | 0 |
| GCST90200682 | COPD || finngen_R12_J10_COPD | 3-methylcytidine levels | Inverse variance weighted (fixed effects) | 17 | -0.032 | 0.015 | 0.031 | -0.062 | -0.003 | 0.968 | 0.940 | 0.997 | 0.762 | 0.212 | 0.044 | 0 |
| GCST90200688 | COPD || finngen_R12_J10_COPD | Androsterone glucuronide levels | Inverse variance weighted (fixed effects) | 24 | 0.042 | 0.021 | 0.045 | 0.001 | 0.083 | 1.043 | 1.001 | 1.087 | 0.104 | 0.278 | 0.020 | 0 |
| GCST90200691 | COPD || finngen_R12_J10_COPD | N-delta-acetylornithine levels | Inverse variance weighted (fixed effects) | 24 | -0.032 | 0.015 | 0.036 | -0.062 | -0.002 | 0.968 | 0.940 | 0.998 | 0.543 | 0.386 | 0.412 | 0 |
| GCST90200707 | COPD || finngen_R12_J10_COPD | Glycine levels | Inverse variance weighted (fixed effects) | 23 | 0.032 | 0.015 | 0.036 | 0.002 | 0.062 | 1.033 | 1.002 | 1.064 | 0.380 | 0.495 | 0.580 | 0 |
| GCST90200711 | COPD || finngen_R12_J10_COPD | X-19141 levels | Inverse variance weighted (fixed effects) | 24 | -0.081 | 0.027 | 0.003 | -0.135 | -0.027 | 0.922 | 0.874 | 0.973 | 0.397 | 0.052 | 0.026 | 2.40E-129 |
| GCST90200729 | COPD || finngen_R12_J10_COPD | 3-phosphoglycerate to phosphate ratio | Inverse variance weighted (fixed effects) | 24 | 0.062 | 0.028 | 0.027 | 0.007 | 0.116 | 1.064 | 1.007 | 1.123 | 0.366 | 0.900 | 0.891 | 1.12E-109 |
| GCST90200733 | COPD || finngen_R12_J10_COPD | Adenosine 5'-diphosphate (ADP) to N-acetylglucosamine to N-acetylgalactosamine ratio | Inverse variance weighted (fixed effects) | 20 | 0.046 | 0.022 | 0.041 | 0.002 | 0.090 | 1.047 | 1.002 | 1.094 | 0.654 | 0.378 | 0.014 | 1.12E-93 |
| GCST90200743 | COPD || finngen_R12_J10_COPD | Arginine to citrulline ratio | Inverse variance weighted (fixed effects) | 32 | 0.063 | 0.025 | 0.011 | 0.014 | 0.111 | 1.065 | 1.014 | 1.118 | 0.524 | 0.346 | 0.346 | 2.19E-175 |
| GCST90200744 | COPD || finngen_R12_J10_COPD | Arginine to glutamate ratio | Inverse variance weighted (fixed effects) | 25 | -0.086 | 0.028 | 0.002 | -0.140 | -0.032 | 0.918 | 0.869 | 0.969 | 0.290 | 0.274 | 0.299 | 8.15E-116 |
| GCST90200758 | COPD || finngen_R12_J10_COPD | Glycine to serine ratio | Inverse variance weighted (fixed effects) | 25 | 0.039 | 0.017 | 0.020 | 0.006 | 0.072 | 1.040 | 1.006 | 1.075 | 0.801 | 0.774 | 0.757 | 0 |
| GCST90200765 | COPD || finngen_R12_J10_COPD | Phosphate to alanine ratio | Inverse variance weighted (fixed effects) | 20 | -0.077 | 0.030 | 0.012 | -0.137 | -0.017 | 0.926 | 0.872 | 0.983 | 0.469 | 0.059 | 0.062 | 1.28E-91 |
| GCST90200781 | COPD || finngen_R12_J10_COPD | Glucose to maltose ratio | Inverse variance weighted (fixed effects) | 16 | -0.067 | 0.031 | 0.028 | -0.127 | -0.007 | 0.935 | 0.881 | 0.993 | 0.985 | 0.192 | 0.203 | 1.21E-74 |
| GCST90200788 | COPD || finngen_R12_J10_COPD | 5-oxoproline to citrate ratio | Inverse variance weighted (fixed effects) | 15 | 0.041 | 0.021 | 0.047 | 0.001 | 0.081 | 1.042 | 1.001 | 1.084 | 0.125 | 0.205 | 0.296 | 2.67E-268 |
| GCST90200789 | COPD || finngen_R12_J10_COPD | Alpha-tocopherol to sulfate ratio | Inverse variance weighted (fixed effects) | 18 | -0.085 | 0.035 | 0.014 | -0.153 | -0.018 | 0.918 | 0.858 | 0.983 | 0.649 | 0.071 | 0.075 | 1.20E-80 |
| GCST90200807 | COPD || finngen_R12_J10_COPD | Carnitine to ergothioneine ratio | Inverse variance weighted (fixed effects) | 21 | 0.064 | 0.025 | 0.010 | 0.016 | 0.113 | 1.067 | 1.016 | 1.120 | 0.620 | 0.187 | 0.111 | 9.27E-154 |
| GCST90200821 | COPD || finngen_R12_J10_COPD | Adenosine 5'-diphosphate (ADP) to glycine ratio | Inverse variance weighted (multiplicative random effects) | 25 | 0.050 | 0.025 | 0.041 | 0.002 | 0.099 | 1.052 | 1.002 | 1.104 | 0.333 | 0.003 | 0.002 | 2.26E-116 |
| GCST90200831 | COPD || finngen_R12_J10_COPD | Cholate to phosphate ratio | Inverse variance weighted (multiplicative random effects) | 18 | 0.084 | 0.041 | 0.041 | 0.004 | 0.165 | 1.088 | 1.004 | 1.179 | 0.688 | 0.003 | 0.003 | 3.93E-78 |
| GCST90200874 | COPD || finngen_R12_J10_COPD | Cysteinylglycine to taurine ratio | Inverse variance weighted (fixed effects) | 31 | 0.052 | 0.022 | 0.021 | 0.008 | 0.096 | 1.053 | 1.008 | 1.100 | 0.655 | 0.726 | 0.737 | 3.63E-160 |
| GCST90200875 | COPD || finngen_R12_J10_COPD | Cysteinylglycine to glutamate ratio | Inverse variance weighted (multiplicative random effects) | 25 | -0.106 | 0.031 | 0.001 | -0.168 | -0.045 | 0.899 | 0.845 | 0.956 | 0.197 | 0.018 | 0.021 | 2.76E-121 |
| GCST90200876 | COPD || finngen_R12_J10_COPD | Cortisone to 4-cholesten-3-one ratio | Inverse variance weighted (fixed effects) | 32 | -0.033 | 0.015 | 0.029 | -0.063 | -0.003 | 0.967 | 0.939 | 0.997 | 0.518 | 0.080 | 0.123 | 2.40E-151 |
| GCST90200883 | COPD || finngen_R12_J10_COPD | Phosphate to acetoacetate ratio | Inverse variance weighted (fixed effects) | 25 | -0.046 | 0.023 | 0.043 | -0.091 | -0.001 | 0.955 | 0.913 | 0.999 | 0.218 | 0.628 | 0.651 | 1.85E-118 |
| GCST90200889 | COPD || finngen_R12_J10_COPD | Cholesterol to taurocholate ratio | Inverse variance weighted (fixed effects) | 27 | -0.031 | 0.016 | 0.045 | -0.062 | -0.001 | 0.969 | 0.940 | 0.999 | 0.668 | 0.953 | 0.920 | 2.91E-126 |
| GCST90200933 | COPD || finngen_R12_J10_COPD | Alpha-ketoglutarate to proline ratio | Inverse variance weighted (fixed effects) | 24 | 0.055 | 0.027 | 0.041 | 0.002 | 0.107 | 1.056 | 1.002 | 1.113 | 0.203 | 0.238 | 0.203 | 1.70E-152 |
| GCST90200939 | COPD || finngen_R12_J10_COPD | Proline to trans-4-hydroxyproline ratio | Inverse variance weighted (multiplicative random effects) | 24 | -0.090 | 0.040 | 0.025 | -0.169 | -0.012 | 0.914 | 0.845 | 0.989 | 0.392 | 0.001 | 0.002 | 1.00E-118 |
| GCST90200942 | COPD || finngen_R12_J10_COPD | Glutamate to pyruvate ratio | Inverse variance weighted (fixed effects) | 26 | 0.055 | 0.026 | 0.036 | 0.004 | 0.106 | 1.056 | 1.004 | 1.112 | 0.108 | 0.261 | 0.248 | 2.13E-118 |
| GCST90200952 | COPD || finngen_R12_J10_COPD | Adenosine 5'-diphosphate (ADP) to cytidine ratio | Inverse variance weighted (fixed effects) | 19 | 0.056 | 0.022 | 0.013 | 0.012 | 0.100 | 1.057 | 1.012 | 1.105 | 0.408 | 0.203 | 0.247 | 3.30E-88 |
| GCST90200991 | COPD || finngen_R12_J10_COPD | Histidine to alanine ratio | Inverse variance weighted (fixed effects) | 33 | 0.043 | 0.022 | 0.049 | 0.000 | 0.085 | 1.044 | 1.000 | 1.089 | 0.244 | 0.053 | 0.053 | 1.33E-152 |
| GCST90200998 | COPD || finngen_R12_J10_COPD | Salicylate to citrate ratio | Inverse variance weighted (fixed effects) | 21 | 0.086 | 0.027 | 0.002 | 0.033 | 0.139 | 1.090 | 1.033 | 1.149 | 0.803 | 0.117 | 0.036 | 1.30E-93 |
| GCST90201000 | COPD || finngen_R12_J10_COPD | Serine to threonine ratio | Inverse variance weighted (fixed effects) | 23 | 0.040 | 0.020 | 0.047 | 0.000 | 0.080 | 1.041 | 1.000 | 1.083 | 0.677 | 0.297 | 0.272 | 1.19E-233 |
| GCST90201005 | COPD || finngen_R12_J10_COPD | Fructose to maltose ratio | Inverse variance weighted (fixed effects) | 23 | 0.058 | 0.025 | 0.021 | 0.009 | 0.106 | 1.059 | 1.009 | 1.112 | 0.834 | 0.252 | 0.290 | 2.08E-108 |

Notes: nsnp: the number of single nucleotide polymorphisms; b: beta coefficient; se: standard error; pval: P-value; lo_ci: lower bound of 95% confidence interval; up_ci: upper bound of 95% confidence interval; or: odds ratio; or_lci95: lower bound of 95% confidence interval of odds ratio; or_uci95: upper bound of 95% confidence interval of odds ratio; pleio_P: P-value for horizontal pleiotropy test; heter_P: P-value for heterogeneity test; steiger_pval: P-value of Steiger test
